# Supplementary material for: Data of microstructure and mechanical properties of carbon foams derived from sucrose/polyacrylamide hydrogel
Source: Data Brief. 2016 Feb 15;7:117–22. doi: 10.1016/j.dib.2016.02.022 (PMC4764894; doi:10.1016/j.dib.2016.02.022)
Supplement: Supplementary file 7 — Supplementary material [file mmc7.csv]

num	force	lenth	time	position	biglength	smalllength
1	0.9059425	0.00277812	0.8	0.00277812	0	-0.000208576
1	1.556041	0.00277812	1	0.00277812	0	-0.000207373
1	1.853697	0.00277812	1.2	0.00277812	0	-0.000192458
1	2.310331	0.00555624	1.4	0.00555624	0	-0.000220406
1	2.736514	0.00555624	1.6	0.00555624	0	-0.000249311
1	3.163554	0.00555624	1.8	0.00555624	0	-0.000265245
1	3.643056	0.00555624	2	0.00555624	0	-0.000255576
1	4.122069	0.00555624	2.2	0.00555624	0	-0.000233596
1	4.568676	0.00833436	2.4	0.00833436	0	-0.000242197
1	5.074348	0.00833436	2.6	0.00833436	0	-0.000232104
1	5.60558	0.00833436	2.8	0.00833436	0	-0.00026631
1	6.160292	0.00833436	3	0.00833436	0	-0.000335742
1	6.707176	0.01111248	3.2	0.01111248	0	-0.000250367
1	7.301999	0.01111248	3.4	0.01111248	0	-7.62505E-05
1	7.89193	0.01111248	3.6	0.01111248	0	-0.00019797
1	8.494824	0.01111248	3.8	0.01111248	0	8.01208E-07
1	9.15018	0.0138906	4	0.0138906	0	-2.39474E-05
1	9.756132	0.0138906	4.2	0.0138906	0	3.63701E-05
1	10.34961	0.0138906	4.4	0.0138906	0	8.53891E-05
1	11.00692	0.0138906	4.6	0.0138906	0	2.9277E-05
1	11.71364	0.01666872	4.8	0.01666872	0	3.07983E-05
1	12.32595	0.01666872	5	0.01666872	0	4.05364E-05
1	13.09064	0.01666872	5.2	0.01666872	0	4.77935E-05
1	13.76617	0.01666872	5.4	0.01666872	0	3.23693E-05
1	14.50089	0.01944684	5.6	0.01944684	0	3.30576E-05
1	15.25898	0.01944684	5.8	0.01944684	0	-0.00026466
1	15.90883	0.01944684	6	0.01944684	0	-4.57566E-05
1	16.7195	0.01944684	6.2	0.01944684	0	-0.000155901
1	17.453	0.02222496	6.4	0.02222496	0	-5.93313E-05
1	18.25596	0.02222496	6.6	0.02222496	0	-8.62868E-05
1	19.01208	0.02222496	6.8	0.02222496	0	-0.000104827
1	19.75035	0.02222496	7	0.02222496	0	-0.000134174
1	20.50391	0.02222496	7.2	0.02222496	0	-0.000113622
1	21.2714	0.02500308	7.4	0.02500308	0	-7.69729E-05
1	21.97311	0.02500308	7.6	0.02500308	0	-9.27816E-05
1	22.6813	0.02500308	7.8	0.02500308	0	-0.000113347
1	23.23258	0.02500308	8	0.02500308	0	-0.00014752
1	23.97574	0.0277812	8.2	0.0277812	0	-0.000154095
1	24.68686	0.0277812	8.4	0.0277812	0	-0.000245118
1	25.33183	0.0277812	8.6	0.0277812	0	-0.000296741
1	26.02069	0.0277812	8.8	0.0277812	0	-0.000355645
1	26.60867	0.03055932	9	0.03055932	0	-0.00038614
1	27.22978	0.03055932	9.2	0.03055932	0	-0.000291842
1	27.86618	0.03055932	9.4	0.03055932	0	-2.71451E-05
1	28.52546	0.03055932	9.6	0.03055932	0	0.000195189
1	29.23694	0.03333744	9.8	0.03333744	0	8.31291E-05
1	29.85891	0.03333744	10	0.03333744	0	0.000103123
1	30.46437	0.03333744	10.2	0.03333744	0	0.000131531
1	31.16804	0.03333744	10.4	0.03333744	0	-3.73009E-06
1	31.80517	0.03611556	10.6	0.03611556	0	2.97765E-05
1	32.57218	0.03611556	10.8	0.03611556	0	-8.0276E-05
1	33.24539	0.03611556	11	0.03611556	0	-0.000179056
1	33.79044	0.03611556	11.2	0.03611556	0	-0.000236423
1	34.41779	0.03889368	11.4	0.03889368	0	-0.000258539
1	35.10751	0.03889368	11.6	0.03889368	0	-0.000276542
1	35.73597	0.03889368	11.8	0.03889368	0	-0.000243451
1	36.48549	0.03889368	12	0.03889368	0	-0.000249712
1	37.02198	0.03889368	12.2	0.03889368	0	-0.000287685
1	37.62597	0.0416718	12.4	0.0416718	0	-0.000282875
1	38.28047	0.0416718	12.6	0.0416718	0	-0.000254695
1	38.89193	0.0416718	12.8	0.0416718	0	-0.000213072
1	39.45471	0.0416718	13	0.0416718	0	-0.000122525
1	40.00465	0.04444992	13.2	0.04444992	0	-0.000100524
1	40.64154	0.04444992	13.4	0.04444992	0	-0.000145239
1	41.23343	0.04444992	13.6	0.04444992	0	-0.000143628
1	41.74179	0.04444992	13.8	0.04444992	0	-0.000117047
1	42.33111	0.04722804	14	0.04722804	0	-9.97187E-05
1	43.00946	0.04722804	14.2	0.04722804	0	-0.000126951
1	43.69319	0.04722804	14.4	0.04722804	0	-0.000137715
1	44.34158	0.04722804	14.6	0.04722804	0	-0.000108132
1	44.98653	0.05000616	14.8	0.05000616	0	-0.000111561
1	45.70169	0.05000616	15	0.05000616	0	-0.000136284
1	46.35828	0.05000616	15.2	0.05000616	0	-0.000119359
1	46.89293	0.05000616	15.4	0.05000616	0	-0.000112979
1	47.63548	0.05278428	15.6	0.05278428	0	-0.000101896
1	48.23948	0.05278428	15.8	0.05278428	0	-4.60841E-05
1	48.84138	0.05278428	16	0.05278428	0	-5.85706E-05
1	49.45223	0.05278428	16.2	0.05278428	0	-0.000285512
1	49.97038	0.0555624	16.4	0.0555624	0	-8.20641E-05
1	50.51787	0.0555624	16.6	0.0555624	0	-0.000204348
1	51.08347	0.0555624	16.8	0.0555624	0	-8.54694E-05
1	51.76341	0.0555624	17	0.0555624	0	-9.01561E-05
1	52.34649	0.05834052	17.2	0.05834052	0	-0.0001054
1	52.95366	0.05834052	17.4	0.05834052	0	-3.18252E-05
1	53.4706	0.05834052	17.6	0.05834052	0	-8.85138E-05
1	54.01123	0.05834052	17.8	0.05834052	0	-5.34217E-05
1	54.5964	0.05834052	18	0.05834052	0	5.51033E-05
1	55.26545	0.06111864	18.2	0.06111864	0	-7.53995E-06
1	55.79008	0.06111864	18.4	0.06111864	0	-2.75095E-05
1	56.38025	0.06111864	18.6	0.06111864	0	-0.000233245
1	56.90757	0.06111864	18.8	0.06111864	0	-0.000163224
1	57.5293	0.06389676	19	0.06389676	0	-0.000186063
1	57.21024	0.06389676	19.2	0.06389676	0	-0.000203113
1	57.89128	0.06389676	19.4	0.06389676	0	-0.00010168
1	58.3983	0.06389676	19.6	0.06389676	0	-0.000126354
1	59.06588	0.06667488	19.8	0.06667488	0	-0.000156807
1	59.64799	0.06667488	20	0.06667488	0	-0.00015345
1	60.21322	0.06667488	20.2	0.06667488	0	-0.000135641
1	60.77808	0.06667488	20.4	0.06667488	0	-9.69329E-05
1	61.21722	0.069453	20.6	0.069453	0	-7.74512E-05
1	61.94815	0.069453	20.8	0.069453	0	-5.20508E-05
1	62.45322	0.069453	21	0.069453	0	1.04581E-05
1	63.07054	0.069453	21.2	0.069453	0	-7.22493E-05
1	63.68322	0.07223112	21.4	0.07223112	0	-5.96376E-05
1	64.22374	0.07223112	21.6	0.07223112	0	-3.95327E-05
1	64.79619	0.07223112	21.8	0.07223112	0	4.95497E-06
1	65.40202	0.07223112	22	0.07223112	0	-3.44424E-06
1	65.90304	0.07500924	22.2	0.07500924	0	0.000156613
1	66.47084	0.07500924	22.4	0.07500924	0	0.000233782
1	67.02322	0.07500924	22.6	0.07500924	0	0.000226362
1	67.55006	0.07500924	22.8	0.07500924	0	-4.5224E-05
1	68.19637	0.07778736	23	0.07778736	0	-0.000167243
1	68.74838	0.07778736	23.2	0.07778736	0	-6.03358E-05
1	69.34687	0.07778736	23.4	0.07778736	0	-0.000119037
1	69.97533	0.07778736	23.6	0.07778736	0	-4.08891E-05
1	70.53505	0.07778736	23.8	0.07778736	0	-0.000113396
1	71.06567	0.08056548	24	0.08056548	0	-9.65055E-05
1	71.62833	0.08056548	24.2	0.08056548	0	-0.00012112
1	72.11383	0.08056548	24.4	0.08056548	0	-0.000192012
1	72.76772	0.08056548	24.6	0.08056548	0	-0.000156303
1	73.26458	0.0833436	24.8	0.0833436	0	-0.000182094
1	73.91663	0.0833436	25	0.0833436	0	-0.000267756
1	74.57065	0.0833436	25.2	0.0833436	0	-0.000238415
1	75.09737	0.0833436	25.4	0.0833436	0	-0.000242329
1	75.76006	0.08612172	25.6	0.08612172	0	-0.000259345
1	76.40966	0.08612172	25.8	0.08612172	0	-0.000253979
1	77.09338	0.08612172	26	0.08612172	0	-0.000282664
1	77.82799	0.08612172	26.2	0.08612172	0	-0.000230094
1	78.42183	0.08889984	26.4	0.08889984	0	-0.000231979
1	79.31064	0.08889984	26.6	0.08889984	0	-0.000249658
1	79.8141	0.08889984	26.8	0.08889984	0	-0.000238354
1	80.63541	0.08889984	27	0.08889984	0	-0.000209998
1	81.34373	0.09167796	27.2	0.09167796	0	-0.000224912
1	81.99799	0.09167796	27.4	0.09167796	0	-0.000260404
1	82.70398	0.09167796	27.6	0.09167796	0	-0.000237376
1	83.31947	0.09167796	27.8	0.09167796	0	-0.000275562
1	84.07033	0.09445608	28	0.09445608	0	-0.000309495
1	84.75099	0.09445608	28.2	0.09445608	0	-0.000304557
1	85.54894	0.09445608	28.4	0.09445608	0	-0.000306829
1	86.1061	0.09445608	28.6	0.09445608	0	-0.000309469
1	86.92361	0.09445608	28.8	0.09445608	0	-0.000316266
1	87.48946	0.0972342	29	0.0972342	0	-0.000294825
1	88.15948	0.0972342	29.2	0.0972342	0	-0.000324404
1	88.9501	0.0972342	29.4	0.0972342	0	-0.00035966
1	89.53403	0.0972342	29.6	0.0972342	0	-0.000349308
1	90.26558	0.1000123	29.8	0.1000123	0	-0.000485126
1	91.02171	0.1000123	30	0.1000123	0	-0.000473044
1	91.65041	0.1000123	30.2	0.1000123	0	-0.000423039
1	92.54338	0.1000123	30.4	0.1000123	0	-0.000402128
1	93.31269	0.1027904	30.6	0.1027904	0	-9.00404E-05
1	94.12692	0.1027904	30.8	0.1027904	0	-6.46973E-05
1	95.0293	0.1027904	31	0.1027904	0	-0.00010793
1	95.87029	0.1027904	31.2	0.1027904	0	-9.61597E-05
1	96.69184	0.1055686	31.4	0.1055686	0	-4.04726E-05
1	97.57307	0.1055686	31.6	0.1055686	0	-6.01898E-06
1	98.60729	0.1055686	31.8	0.1055686	0	-4.72839E-05
1	99.62279	0.1055686	32	0.1055686	0	5.65812E-05
1	100.5049	0.1083467	32.2	0.1083467	0	-6.39012E-05
1	101.5013	0.1083467	32.4	0.1083467	0	-6.0963E-05
1	102.579	0.1083467	32.6	0.1083467	0	-0.00017299
1	103.3086	0.1083467	32.8	0.1083467	0	-0.000156412
1	104.1368	0.1111248	33	0.1111248	0	-0.000116257
1	105.147	0.1111248	33.2	0.1111248	0	-0.000132471
1	106.1071	0.1111248	33.4	0.1111248	0	-0.000165425
1	107.1812	0.1111248	33.6	0.1111248	0	-0.000195424
1	108.0336	0.1111248	33.8	0.1111248	0	-0.000157018
1	109.1809	0.1139029	34	0.1139029	0	-0.0001901
1	110.09	0.1139029	34.2	0.1139029	0	-0.000197931
1	111.2212	0.1139029	34.4	0.1139029	0	-0.000205222
1	112.3029	0.1139029	34.6	0.1139029	0	-5.63472E-05
1	113.3232	0.116681	34.8	0.116681	0	-8.70795E-05
1	114.5115	0.116681	35	0.116681	0	-1.59209E-05
1	115.4864	0.116681	35.2	0.116681	0	5.05415E-05
1	116.433	0.116681	35.4	0.116681	0	3.44547E-05
1	117.5121	0.1194592	35.6	0.1194592	0	6.18625E-05
1	118.5221	0.1194592	35.8	0.1194592	0	8.09141E-06
1	119.414	0.1194592	36	0.1194592	0	-3.31031E-06
1	120.3563	0.1194592	36.2	0.1194592	0	-6.03478E-06
1	121.4883	0.1222373	36.4	0.1222373	0	-3.09517E-06
1	122.5746	0.1222373	36.6	0.1222373	0	-2.03495E-05
1	123.7514	0.1222373	36.8	0.1222373	0	-6.13775E-05
1	124.7977	0.1222373	37	0.1222373	0	-9.08611E-05
1	125.9931	0.1250154	37.2	0.1250154	0	-0.00040293
1	127.0782	0.1250154	37.4	0.1250154	0	-0.000293584
1	128.2634	0.1250154	37.6	0.1250154	0	-0.000315305
1	129.3085	0.1250154	37.8	0.1250154	0	-0.000203323
1	130.433	0.1277935	38	0.1277935	0	-0.000270597
1	131.5903	0.1277935	38.2	0.1277935	0	-0.000301867
1	132.6087	0.1277935	38.4	0.1277935	0	-0.000276188
1	133.6433	0.1277935	38.6	0.1277935	0	-0.000465617
1	134.9087	0.1305716	38.8	0.1305716	0	-0.000270416
1	136.0159	0.1305716	39	0.1305716	0	-0.00026503
1	137.162	0.1305716	39.2	0.1305716	0	-0.000252523
1	138.3138	0.1305716	39.4	0.1305716	0	-0.000230454
1	139.3027	0.1305716	39.6	0.1305716	0	-0.000202653
1	140.4912	0.1333498	39.8	0.1333498	0	-0.000186638
1	141.5925	0.1333498	40	0.1333498	0	-0.000254831
1	142.7537	0.1333498	40.2	0.1333498	0	-0.00038766
1	143.935	0.1333498	40.4	0.1333498	0	-0.000379915
1	145.0499	0.1361279	40.6	0.1361279	0	-0.000396134
1	146.2341	0.1361279	40.8	0.1361279	0	-0.000270241
1	147.4413	0.1361279	41	0.1361279	0	-0.000235355
1	148.5808	0.1361279	41.2	0.1361279	0	-0.000319075
1	149.7922	0.138906	41.4	0.138906	0	-0.000206647
1	150.9983	0.138906	41.6	0.138906	0	-4.56252E-05
1	152.1207	0.138906	41.8	0.138906	0	-0.000173946
1	153.3261	0.138906	42	0.138906	0	-5.19159E-05
1	154.5497	0.1416841	42.2	0.1416841	0	1.65254E-05
1	155.7627	0.1416841	42.4	0.1416841	0	-1.36149E-05
1	156.7442	0.1416841	42.6	0.1416841	0	-9.1614E-05
1	157.9334	0.1416841	42.8	0.1416841	0	-6.14014E-05
1	159.1015	0.1444622	43	0.1444622	0	-0.000214697
1	160.2079	0.1444622	43.2	0.1444622	0	-0.000246436
1	161.5587	0.1444622	43.4	0.1444622	0	-0.000141021
1	162.5733	0.1444622	43.6	0.1444622	0	-0.000262969
1	163.6408	0.1472404	43.8	0.1472404	0	-0.000202451
1	164.8613	0.1472404	44	0.1472404	0	-0.000213248
1	166.0173	0.1472404	44.2	0.1472404	0	-0.000218795
1	167.0652	0.1472404	44.4	0.1472404	0	-0.000203679
1	168.1907	0.1472404	44.6	0.1472404	0	-0.000150905
1	169.2771	0.1500185	44.8	0.1500185	0	-0.000134451
1	170.5472	0.1500185	45	0.1500185	0	-1.01199E-05
1	171.7202	0.1500185	45.2	0.1500185	0	-9.91968E-05
1	172.7983	0.1500185	45.4	0.1500185	0	-0.000105561
1	173.9747	0.1527966	45.6	0.1527966	0	-8.39211E-05
1	174.9955	0.1527966	45.8	0.1527966	0	-1.24882E-05
1	176.1631	0.1527966	46	0.1527966	0	-5.56665E-06
1	177.2974	0.1527966	46.2	0.1527966	0	5.77891E-05
1	178.3103	0.1555747	46.4	0.1555747	0	-8.33415E-06
1	179.3138	0.1555747	46.6	0.1555747	0	1.47165E-05
1	180.2295	0.1555747	46.8	0.1555747	0	-1.80811E-06
1	181.226	0.1555747	47	0.1555747	0	-0.000261397
1	182.0576	0.1583529	47.2	0.1583529	0	-4.8294E-06
1	182.8735	0.1583529	47.4	0.1583529	0	-0.000149515
1	183.7701	0.1583529	47.6	0.1583529	0	-4.71797E-05
1	184.6035	0.1583529	47.8	0.1583529	0	-7.59437E-05
1	185.3064	0.161131	48	0.161131	0	-0.00044394
1	186.137	0.161131	48.2	0.161131	0	-0.000194795
1	186.9146	0.161131	48.4	0.161131	0	-0.00034427
1	187.6694	0.161131	48.6	0.161131	0	-0.000330139
1	188.4984	0.1639091	48.8	0.1639091	0	-0.00027143
1	189.1344	0.1639091	49	0.1639091	0	-0.000296026
1	189.9777	0.1639091	49.2	0.1639091	0	-0.000379693
1	190.7945	0.1639091	49.4	0.1639091	0	-0.000397505
1	191.541	0.1639091	49.6	0.1639091	0	-0.000367714
1	192.2925	0.1666872	49.8	0.1666872	0	-0.000377749
1	193.0228	0.1666872	50	0.1666872	0	-0.000366319
1	193.9543	0.1666872	50.2	0.1666872	0	-0.000242526
1	194.5981	0.1666872	50.4	0.1666872	0	-0.00034643
1	195.4687	0.1694653	50.6	0.1694653	0	-0.000243015
1	196.3618	0.1694653	50.8	0.1694653	0	-0.000275836
1	197.0011	0.1694653	51	0.1694653	0	-0.00025226
1	197.8217	0.1694653	51.2	0.1694653	0	-0.000264608
1	198.5398	0.1722434	51.4	0.1722434	0	-0.000268069
1	199.373	0.1722434	51.6	0.1722434	0	-0.000295981
1	200.0962	0.1722434	51.8	0.1722434	0	-0.000285328
1	200.8849	0.1722434	52	0.1722434	0	-0.000236624
1	201.6635	0.1750216	52.2	0.1750216	0	-0.000242813
1	202.2501	0.1750216	52.4	0.1750216	0	-0.000194908
1	203.1057	0.1750216	52.6	0.1750216	0	-0.00025218
1	203.6314	0.1750216	52.8	0.1750216	0	-0.000227829
1	204.4595	0.1777997	53	0.1777997	0	-0.000249898
1	205.1981	0.1777997	53.2	0.1777997	0	-0.00049504
1	205.8653	0.1777997	53.4	0.1777997	0	-0.000368204
1	206.5213	0.1777997	53.6	0.1777997	0	-0.00037451
1	207.3475	0.1805778	53.8	0.1805778	0	-0.000323696
1	208.0763	0.1805778	54	0.1805778	0	-0.000338954
1	208.7525	0.1805778	54.2	0.1805778	0	-0.000592894
1	209.5237	0.1805778	54.4	0.1805778	0	-0.000436509
1	210.1507	0.1805778	54.6	0.1805778	0	-0.000567998
1	210.8852	0.1833559	54.8	0.1833559	0	-0.000657902
1	211.6124	0.1833559	55	0.1833559	0	-0.000892884
1	212.2569	0.1833559	55.2	0.1833559	0	-0.000781288
1	212.9411	0.1833559	55.4	0.1833559	0	-0.000786719
1	213.6342	0.186134	55.6	0.186134	0	-0.000697845
1	214.3705	0.186134	55.8	0.186134	0	-0.000700223
1	215.0362	0.186134	56	0.186134	0	-0.000729293
1	215.7137	0.186134	56.2	0.186134	0	-0.000719514
1	216.4057	0.1889122	56.4	0.1889122	0	-0.000675044
1	217.0422	0.1889122	56.6	0.1889122	0	-0.00062997
1	217.6264	0.1889122	56.8	0.1889122	0	-0.000607207
1	218.2477	0.1889122	57	0.1889122	0	-0.000606516
1	219.0166	0.1916903	57.2	0.1916903	0	-0.00057769
1	219.5849	0.1916903	57.4	0.1916903	0	-0.0005779
1	220.1869	0.1916903	57.6	0.1916903	0	-0.000571287
1	220.9608	0.1916903	57.8	0.1916903	0	-0.000587999
1	221.57	0.1944684	58	0.1944684	0	-0.000582262
1	222.1597	0.1944684	58.2	0.1944684	0	-0.000577221
1	222.8275	0.1944684	58.4	0.1944684	0	-0.000570894
1	223.437	0.1944684	58.6	0.1944684	0	-0.000590694
1	224.0597	0.1972465	58.8	0.1972465	0	-0.000836542
1	224.6732	0.1972465	59	0.1972465	0	-0.000742358
1	225.3982	0.1972465	59.2	0.1972465	0	-0.000852919
1	226.1127	0.1972465	59.4	0.1972465	0	-0.000811743
1	226.7341	0.1972465	59.6	0.1972465	0	-0.000700862
1	227.4753	0.2000246	59.8	0.2000246	0	-0.000433566
1	228.0474	0.2000246	60	0.2000246	0	-0.000528582
1	228.7284	0.2000246	60.2	0.2000246	0	-0.000512586
1	229.4284	0.2000246	60.4	0.2000246	0	-0.000473948
1	230.0383	0.2028028	60.6	0.2028028	0	-0.000599964
1	230.8179	0.2028028	60.8	0.2028028	0	-0.00056756
1	231.331	0.2028028	61	0.2028028	0	-0.000571825
1	232.0704	0.2028028	61.2	0.2028028	0	-0.000672115
1	232.76	0.2055809	61.4	0.2055809	0	-0.000617512
1	233.4001	0.2055809	61.6	0.2055809	0	-0.000614998
1	234.1201	0.2055809	61.8	0.2055809	0	-0.00062207
1	234.7628	0.2055809	62	0.2055809	0	-0.000652505
1	235.3792	0.208359	62.2	0.208359	0	-0.000667035
1	236.0723	0.208359	62.4	0.208359	0	-0.000662
1	236.6919	0.208359	62.6	0.208359	0	-0.000672439
1	237.4036	0.208359	62.8	0.208359	0	-0.000664513
1	238.1758	0.2111371	63	0.2111371	0	-0.000690821
1	238.7763	0.2111371	63.2	0.2111371	0	-0.000697726
1	239.6746	0.2111371	63.4	0.2111371	0	-0.000694898
1	240.2762	0.2111371	63.6	0.2111371	0	-0.000662971
1	240.9594	0.2139152	63.8	0.2139152	0	-0.000630523
1	241.7344	0.2139152	64	0.2139152	0	-0.000519713
1	242.4361	0.2139152	64.2	0.2139152	0	-0.000592311
1	243.2102	0.2139152	64.4	0.2139152	0	-0.000834225
1	243.9908	0.2166934	64.6	0.2166934	0	-0.000614356
1	244.6996	0.2166934	64.8	0.2166934	0	-0.000541149
1	245.5126	0.2166934	65	0.2166934	0	-0.000704802
1	246.2259	0.2166934	65.2	0.2166934	0	-0.000618217
1	247.0102	0.2166934	65.4	0.2166934	0	-0.000657727
1	247.8601	0.2194715	65.6	0.2194715	0	-0.000674546
1	248.5668	0.2194715	65.8	0.2194715	0	-0.000660348
1	249.4695	0.2194715	66	0.2194715	0	-0.000323015
1	250.1104	0.2194715	66.2	0.2194715	0	-0.000433613
1	250.8987	0.2222496	66.4	0.2222496	0	-0.000455939
1	251.6418	0.2222496	66.6	0.2222496	0	-0.000684148
1	252.4957	0.2222496	66.8	0.2222496	0	-0.000582078
1	253.2782	0.2222496	67	0.2222496	0	-0.000713412
1	254.0697	0.2250277	67.2	0.2250277	0	-0.000787747
1	254.7684	0.2250277	67.4	0.2250277	0	-0.000838946
1	255.6736	0.2250277	67.6	0.2250277	0	-0.000842662
1	256.5143	0.2250277	67.8	0.2250277	0	-0.000582575
1	257.1786	0.2278059	68	0.2278059	0	-0.000464392
1	258.1042	0.2278059	68.2	0.2278059	0	-0.00052238
1	258.7217	0.2278059	68.4	0.2278059	0	-0.00047977
1	259.5785	0.2278059	68.6	0.2278059	0	-0.000441226
1	260.517	0.230584	68.8	0.230584	0	-0.000422255
1	261.1778	0.230584	69	0.230584	0	-0.000477154
1	262.005	0.230584	69.2	0.230584	0	-0.000428671
1	262.7404	0.230584	69.4	0.230584	0	-0.000432471
1	263.5342	0.2333621	69.6	0.2333621	0	-0.00043775
1	264.3489	0.2333621	69.8	0.2333621	0	-0.000434321
1	265.1479	0.2333621	70	0.2333621	0	-0.000404735
1	265.9513	0.2333621	70.2	0.2333621	0	-0.000409144
1	266.7814	0.2333621	70.4	0.2333621	0	-0.000406224
1	267.589	0.2361402	70.6	0.2361402	0	-0.000398017
1	268.5308	0.2361402	70.8	0.2361402	0	-0.000452147
1	269.3616	0.2361402	71	0.2361402	0	-0.000463966
1	270.2265	0.2361402	71.2	0.2361402	0	-0.000620246
1	271.2229	0.2389183	71.4	0.2389183	0	-0.000669237
1	271.9466	0.2389183	71.6	0.2389183	0	-0.000675256
1	272.9628	0.2389183	71.8	0.2389183	0	-0.000684965
1	273.8534	0.2389183	72	0.2389183	0	-0.00064399
1	274.7094	0.2416964	72.2	0.2416964	0	-0.000671717
1	275.8052	0.2416964	72.4	0.2416964	0	-0.000651387
1	276.5108	0.2416964	72.6	0.2416964	0	-0.000658437
1	277.639	0.2416964	72.8	0.2416964	0	-0.000636457
1	278.548	0.2444746	73	0.2444746	0	-0.000528049
1	279.3566	0.2444746	73.2	0.2444746	0	-0.000565387
1	280.4106	0.2444746	73.4	0.2444746	0	-0.00057253
1	281.3957	0.2444746	73.6	0.2444746	0	-0.00072174
1	282.3055	0.2472527	73.8	0.2472527	0	-0.000594436
1	283.5238	0.2472527	74	0.2472527	0	-0.000690192
1	284.3992	0.2472527	74.2	0.2472527	0	-0.000717463
1	285.5505	0.2472527	74.4	0.2472527	0	-0.00063292
1	286.5642	0.2500308	74.6	0.2500308	0	-0.0006727
1	287.5919	0.2500308	74.8	0.2500308	0	-0.000675957
1	288.7672	0.2500308	75	0.2500308	0	-0.000662135
1	289.7746	0.2500308	75.2	0.2500308	0	-0.000681375
1	290.9398	0.2528089	75.4	0.2528089	0	-0.000977199
1	292.0414	0.2528089	75.6	0.2528089	0	-0.001109711
1	293.1746	0.2528089	75.8	0.2528089	0	-0.001001062
1	294.4249	0.2528089	76	0.2528089	0	-0.001001886
1	295.4507	0.2528089	76.2	0.2528089	0	-0.001008377
1	296.7203	0.255587	76.4	0.255587	0	-0.000963952
1	297.8533	0.255587	76.6	0.255587	0	-0.001005446
1	298.743	0.255587	76.8	0.255587	0	-0.000753694
1	300.0756	0.255587	77	0.255587	0	-0.000507612
1	301.2063	0.2583652	77.2	0.2583652	0	-0.000627605
1	302.4577	0.2583652	77.4	0.2583652	0	-0.000547611
1	303.5623	0.2583652	77.6	0.2583652	0	-0.000554159
1	304.7504	0.2583652	77.8	0.2583652	0	-0.000709752
1	306.0886	0.2611433	78	0.2611433	0	-0.000675639
1	307.374	0.2611433	78.2	0.2611433	0	-0.000740804
1	308.3606	0.2611433	78.4	0.2611433	0	-0.000748239
1	309.814	0.2611433	78.6	0.2611433	0	-0.000666399
1	311.0717	0.2639214	78.8	0.2639214	0	-0.000578243
1	312.0575	0.2639214	79	0.2639214	0	-0.00058194
1	313.5025	0.2639214	79.2	0.2639214	0	-0.000585871
1	314.882	0.2639214	79.4	0.2639214	0	-0.000625451
1	316.0491	0.2666995	79.6	0.2666995	0	-0.00060548
1	317.4496	0.2666995	79.8	0.2666995	0	-0.000617335
1	318.655	0.2666995	80	0.2666995	0	-0.000654695
1	319.7744	0.2666995	80.2	0.2666995	0	-0.000723305
1	320.9779	0.2694776	80.4	0.2694776	0	-0.000513086
1	322.2027	0.2694776	80.6	0.2694776	0	-0.000621965
1	323.2142	0.2694776	80.8	0.2694776	0	-0.000463228
1	324.1733	0.2694776	81	0.2694776	0	-0.00048726
1	325.9115	0.2694776	81.2	0.2694776	0	-0.000740084
1	326.9601	0.2722558	81.4	0.2722558	0	-0.000851573
1	328.5142	0.2722558	81.6	0.2722558	0	-0.000745807
1	329.9964	0.2722558	81.8	0.2722558	0	-0.000724948
1	331.1342	0.2722558	82	0.2722558	0	-0.000738288
1	332.4171	0.2750339	82.2	0.2750339	0	-0.000705172
1	333.9876	0.2750339	82.4	0.2750339	0	-0.000734946
1	334.8414	0.2750339	82.6	0.2750339	0	-0.00056219
1	336.5285	0.2750339	82.8	0.2750339	0	-0.000701407
1	337.909	0.277812	83	0.277812	0	-0.000662213
1	339.3257	0.277812	83.2	0.277812	0	-0.00055047
1	340.7856	0.277812	83.4	0.277812	0	-0.00056807
1	342.1853	0.277812	83.6	0.277812	0	-0.000617854
1	343.6323	0.2805901	83.8	0.2805901	0	-0.000566604
1	345.2916	0.2805901	84	0.2805901	0	-0.000326275
1	346.5387	0.2805901	84.2	0.2805901	0	-0.000535748
1	348.1787	0.2805901	84.4	0.2805901	0	-0.000516436
1	349.426	0.2833683	84.6	0.2833683	0	-0.000502013
1	350.8722	0.2833683	84.8	0.2833683	0	-0.000521225
1	352.6772	0.2833683	85	0.2833683	0	-0.000486205
1	354.0182	0.2833683	85.2	0.2833683	0	-0.000444179
1	355.6015	0.2861464	85.4	0.2861464	0	-0.000472738
1	357.3431	0.2861464	85.6	0.2861464	0	-0.000516601
1	358.7826	0.2861464	85.8	0.2861464	0	-0.00048592
1	360.4624	0.2861464	86	0.2861464	0	-0.000485874
1	362.0204	0.2861464	86.2	0.2861464	0	-0.000499146
1	363.6177	0.2889245	86.4	0.2889245	0	-0.000501807
1	365.1924	0.2889245	86.6	0.2889245	0	-0.000542984
1	366.5108	0.2889245	86.8	0.2889245	0	-0.000556363
1	368.2332	0.2889245	87	0.2889245	0	-0.000536094
1	369.6898	0.2917026	87.2	0.2917026	0	-0.000507722
1	370.9729	0.2917026	87.4	0.2917026	0	-0.000530126
1	372.6129	0.2917026	87.6	0.2917026	0	-0.000516452
1	374.0811	0.2917026	87.8	0.2917026	0	-0.000500973
1	375.6825	0.2944807	88	0.2944807	0	-0.000453724
1	377.2628	0.2944807	88.2	0.2944807	0	-0.000432978
1	378.6747	0.2944807	88.4	0.2944807	0	-0.000432657
1	380.2238	0.2944807	88.6	0.2944807	0	-0.000399022
1	381.7074	0.2972589	88.8	0.2972589	0	-0.000390647
1	383.2793	0.2972589	89	0.2972589	0	-0.000386902
1	384.6179	0.2972589	89.2	0.2972589	0	-0.000374549
1	386.1033	0.2972589	89.4	0.2972589	0	-0.000380636
1	387.5775	0.300037	89.6	0.300037	0	-0.000404589
1	388.9387	0.300037	89.8	0.300037	0	-0.000424365
1	390.4177	0.300037	90	0.300037	0	-0.000571428
1	392.1669	0.300037	90.2	0.300037	0	-0.000661756
1	393.4214	0.3028151	90.4	0.3028151	0	-0.000737327
1	394.9256	0.3028151	90.6	0.3028151	0	-0.000770927
1	396.4902	0.3028151	90.8	0.3028151	0	-0.000632521
1	397.8751	0.3028151	91	0.3028151	0	-0.000647475
1	399.4603	0.3055932	91.2	0.3055932	0	-0.000572105
1	401.0769	0.3055932	91.4	0.3055932	0	-0.000469845
1	402.5094	0.3055932	91.6	0.3055932	0	-0.000534766
1	404.2574	0.3055932	91.8	0.3055932	0	-0.00059554
1	405.832	0.3055932	92	0.3055932	0	-0.000579825
1	407.3889	0.3083713	92.2	0.3083713	0	-0.000664415
1	408.9508	0.3083713	92.4	0.3083713	0	-0.000575675
1	410.6051	0.3083713	92.6	0.3083713	0	-0.000588064
1	412.1015	0.3083713	92.8	0.3083713	0	-0.000606044
1	413.6554	0.3111494	93	0.3111494	0	-0.000599997
1	415.1946	0.3111494	93.2	0.3111494	0	-0.000309029
1	417.2324	0.3111494	93.4	0.3111494	0	-0.000429086
1	418.8272	0.3111494	93.6	0.3111494	0	-0.00040282
1	420.2282	0.3139276	93.8	0.3139276	0	-0.000479362
1	421.9235	0.3139276	94	0.3139276	0	-0.000455649
1	423.6702	0.3139276	94.2	0.3139276	0	-0.000407319
1	425.5612	0.3139276	94.4	0.3139276	0	-0.000369113
1	427.2489	0.3167057	94.6	0.3167057	0	-0.000369988
1	428.8749	0.3167057	94.8	0.3167057	0	-0.000384583
1	430.6203	0.3167057	95	0.3167057	0	-0.000359469
1	432.3865	0.3167057	95.2	0.3167057	0	-0.000355082
1	434.1194	0.3194838	95.4	0.3194838	0	-0.000360258
1	435.8215	0.3194838	95.6	0.3194838	0	-0.000362768
1	437.2383	0.3194838	95.8	0.3194838	0	-0.000370571
1	439.1494	0.3194838	96	0.3194838	0	-0.000364686
1	440.8913	0.3222619	96.2	0.3222619	0	-0.000347535
1	442.5365	0.3222619	96.4	0.3222619	0	-0.000339645
1	444.5678	0.3222619	96.6	0.3222619	0	-0.000380257
1	446.4833	0.3222619	96.8	0.3222619	0	-0.000354462
1	448.0513	0.3222619	97	0.3222619	0	-0.000359173
1	449.8488	0.32504	97.2	0.32504	0	-0.000514698
1	451.7376	0.32504	97.4	0.32504	0	-0.000501287
1	453.6212	0.32504	97.6	0.32504	0	-0.000619759
1	455.2802	0.32504	97.8	0.32504	0	-0.000676893
1	457.0892	0.3278182	98	0.3278182	0	-0.000541883
1	459.1506	0.3278182	98.2	0.3278182	0	-0.000340331
1	460.767	0.3278182	98.4	0.3278182	0	-0.000468275
1	462.6141	0.3278182	98.6	0.3278182	0	-0.000456348
1	464.3489	0.3305963	98.8	0.3305963	0	-0.000509876
1	466.0255	0.3305963	99	0.3305963	0	-0.000500329
1	467.9661	0.3305963	99.2	0.3305963	0	-0.000484348
1	469.519	0.3305963	99.4	0.3305963	0	-0.000724633
1	471.1632	0.3333744	99.6	0.3333744	0	-0.000625347
1	472.903	0.3333744	99.8	0.3333744	0	-0.000809104
1	474.5222	0.3333744	100	0.3333744	0	-0.001045613
1	476.5987	0.3333744	100.2	0.3333744	0	-0.00087876
1	478.2484	0.3361525	100.4	0.3361525	0	-0.000637716
1	480.1685	0.3361525	100.6	0.3361525	0	-0.000778084
1	481.9423	0.3361525	100.8	0.3361525	0	-0.000827334
1	483.6311	0.3361525	101	0.3361525	0	-0.000816062
1	485.6162	0.3389307	101.2	0.3389307	0	-0.000818482
1	486.9892	0.3389307	101.4	0.3389307	0	-0.000790923
1	488.4695	0.3389307	101.6	0.3389307	0	-0.000774091
1	490.5386	0.3389307	101.8	0.3389307	0	-0.000766247
1	492.1888	0.3389307	102	0.3389307	0	-0.000845516
1	493.6632	0.3417088	102.2	0.3417088	0	-0.00086307
1	495.5778	0.3417088	102.4	0.3417088	0	-0.000939138
1	497.4586	0.3417088	102.6	0.3417088	0	-0.001021254
1	499.1625	0.3417088	102.8	0.3417088	0	-0.000921041
1	501.1599	0.3444869	103	0.3444869	0	-0.000924562
1	502.6188	0.3444869	103.2	0.3444869	0	-0.000961861
1	504.498	0.3444869	103.4	0.3444869	0	-0.000979378
1	506.3553	0.3444869	103.6	0.3444869	0	-0.000943636
1	507.8431	0.347265	103.8	0.347265	0	-0.000956206
1	509.8299	0.347265	104	0.347265	0	-0.000962336
1	511.5858	0.347265	104.2	0.347265	0	-0.000943855
1	513.3461	0.347265	104.4	0.347265	0	-0.000972924
1	515.0403	0.3500431	104.6	0.3500431	0	-0.000984174
1	516.9387	0.3500431	104.8	0.3500431	0	-0.000959424
1	518.9572	0.3500431	105	0.3500431	0	-0.000950392
1	520.595	0.3500431	105.2	0.3500431	0	-0.000946025
1	522.2611	0.3528213	105.4	0.3528213	0	-0.000864028
1	523.9268	0.3528213	105.6	0.3528213	0	-0.000909992
1	525.7977	0.3528213	105.8	0.3528213	0	-0.000884005
1	527.5689	0.3528213	106	0.3528213	0	-0.000868952
1	529.046	0.3555994	106.2	0.3555994	0	-0.000843521
1	530.7896	0.3555994	106.4	0.3555994	0	-0.000854114
1	532.371	0.3555994	106.6	0.3555994	0	-0.000973907
1	533.8227	0.3555994	106.8	0.3555994	0	-0.000913515
1	535.7515	0.3583775	107	0.3583775	0	-0.001009478
1	537.6082	0.3583775	107.2	0.3583775	0	-0.000926732
1	539.2303	0.3583775	107.4	0.3583775	0	-0.000926478
1	541.0443	0.3583775	107.6	0.3583775	0	-0.000816004
1	542.6459	0.3583775	107.8	0.3583775	0	-0.000813157
1	544.2892	0.3611556	108	0.3611556	0	-0.000765383
1	546.2526	0.3611556	108.2	0.3611556	0	-0.000821666
1	547.8162	0.3611556	108.4	0.3611556	0	-0.000813959
1	549.7253	0.3611556	108.6	0.3611556	0	-0.000806483
1	551.4645	0.3639337	108.8	0.3639337	0	-0.000807993
1	553.2104	0.3639337	109	0.3639337	0	-0.000834692
1	555.1944	0.3639337	109.2	0.3639337	0	-0.000868486
1	556.7114	0.3639337	109.4	0.3639337	0	-0.000871504
1	558.723	0.3667119	109.6	0.3667119	0	-0.000919698
1	560.6133	0.3667119	109.8	0.3667119	0	-0.000948119
1	562.1234	0.3667119	110	0.3667119	0	-0.000950189
1	563.9155	0.3667119	110.2	0.3667119	0	-0.000938824
1	565.5049	0.36949	110.4	0.36949	0	-0.000919876
1	567.5295	0.36949	110.6	0.36949	0	-0.000823136
1	569.1883	0.36949	110.8	0.36949	0	-0.000928732
1	570.6502	0.36949	111	0.36949	0	-0.00092486
1	572.781	0.3722681	111.2	0.3722681	0	-0.001002862
1	574.4858	0.3722681	111.4	0.3722681	0	-0.001035288
1	576.0438	0.3722681	111.6	0.3722681	0	-0.000947023
1	577.938	0.3722681	111.8	0.3722681	0	-0.000936025
1	579.6635	0.3722681	112	0.3722681	0	-0.000968445
1	581.4016	0.3750462	112.2	0.3750462	0	-0.000964851
1	583.1906	0.3750462	112.4	0.3750462	0	-0.00096214
1	584.8612	0.3750462	112.6	0.3750462	0	-0.000983501
1	586.8438	0.3750462	112.8	0.3750462	0	-0.000979435
1	588.4014	0.3778243	113	0.3778243	0	-0.001115836
1	590.2186	0.3778243	113.2	0.3778243	0	-0.001135068
1	592.4444	0.3778243	113.4	0.3778243	0	-0.001073538
1	594.0751	0.3778243	113.6	0.3778243	0	-0.001073295
1	595.7901	0.3806024	113.8	0.3806024	0	-0.001117374
1	597.8696	0.3806024	114	0.3806024	0	-0.001068824
1	599.4682	0.3806024	114.2	0.3806024	0	-0.000691907
1	601.386	0.3806024	114.4	0.3806024	0	-0.000879334
1	603.5941	0.3833806	114.6	0.3833806	0	-0.000777883
1	605.4068	0.3833806	114.8	0.3833806	0	-0.000930643
1	606.9985	0.3833806	115	0.3833806	0	-0.000892954
1	608.7382	0.3833806	115.2	0.3833806	0	-0.000888203
1	610.9119	0.3861587	115.4	0.3861587	0	-0.00099819
1	612.7382	0.3861587	115.6	0.3861587	0	-0.000902957
1	614.4734	0.3861587	115.8	0.3861587	0	-0.000936673
1	616.343	0.3861587	116	0.3861587	0	-0.00091993
1	618.1212	0.3889368	116.2	0.3889368	0	-0.000946037
1	620.1155	0.3889368	116.4	0.3889368	0	-0.000899209
1	621.7246	0.3889368	116.6	0.3889368	0	-0.00079971
1	623.5264	0.3889368	116.8	0.3889368	0	-0.000889034
1	625.5743	0.3917149	117	0.3917149	0	-0.001058396
1	627.3123	0.3917149	117.2	0.3917149	0	-0.000903525
1	629.3132	0.3917149	117.4	0.3917149	0	-0.001030323
1	631.2405	0.3917149	117.6	0.3917149	0	-0.001025997
1	633.0503	0.394493	117.8	0.394493	0	-0.000907688
1	635.1735	0.394493	118	0.394493	0	-0.000936331
1	636.3482	0.394493	118.2	0.394493	0	-0.000958564
1	638.0747	0.394493	118.4	0.394493	0	-0.000957052
1	640.3076	0.394493	118.6	0.394493	0	-0.000953677
1	642.4296	0.3972712	118.8	0.3972712	0	-0.00098713
1	643.8184	0.3972712	119	0.3972712	0	-0.001066385
1	645.7295	0.3972712	119.2	0.3972712	0	-0.000957636
1	647.7927	0.3972712	119.4	0.3972712	0	-0.000782189
1	649.8268	0.4000493	119.6	0.4000493	0	-0.00089698
1	651.4196	0.4000493	119.8	0.4000493	0	-0.000880619
1	653.4381	0.4000493	120	0.4000493	0	-0.000995007
1	655.4156	0.4000493	120.2	0.4000493	0	-0.000934131
1	657.2372	0.4028274	120.4	0.4028274	0	-0.000915001
1	658.9702	0.4028274	120.6	0.4028274	0	-0.000936376
1	661.046	0.4028274	120.8	0.4028274	0	-0.00096875
1	663.0329	0.4028274	121	0.4028274	0	-0.000979109
1	664.93	0.4056055	121.2	0.4056055	0	-0.000972048
1	666.9441	0.4056055	121.4	0.4056055	0	-0.000951238
1	668.9196	0.4056055	121.6	0.4056055	0	-0.000824765
1	670.9686	0.4056055	121.8	0.4056055	0	-0.000858972
1	672.6254	0.4083837	122	0.4083837	0	-0.000818882
1	674.4029	0.4083837	122.2	0.4083837	0	-0.000870204
1	676.4803	0.4083837	122.4	0.4083837	0	-0.000858865
1	678.3088	0.4083837	122.6	0.4083837	0	-0.00087697
1	680.1429	0.4111618	122.8	0.4111618	0	-0.000820289
1	682.1667	0.4111618	123	0.4111618	0	-0.000615901
1	684.2332	0.4111618	123.2	0.4111618	0	-0.000821937
1	686.0518	0.4111618	123.4	0.4111618	0	-0.000656886
1	687.8971	0.4111618	123.6	0.4111618	0	-0.000667405
1	689.8882	0.4139399	123.8	0.4139399	0	-0.000748978
1	691.8579	0.4139399	124	0.4139399	0	-0.000704158
1	693.7477	0.4139399	124.2	0.4139399	0	-0.000675586
1	695.8315	0.4139399	124.4	0.4139399	0	-0.000709221
1	697.3799	0.416718	124.6	0.416718	0	-0.000721655
1	699.6182	0.416718	124.8	0.416718	0	-0.000834574
1	701.5424	0.416718	125	0.416718	0	-0.000838889
1	703.1732	0.416718	125.2	0.416718	0	-0.000799281
1	705.5414	0.4194961	125.4	0.4194961	0	-0.000801921
1	707.5737	0.4194961	125.6	0.4194961	0	-0.000818543
1	709.2709	0.4194961	125.8	0.4194961	0	-0.000810521
1	711.4285	0.4194961	126	0.4194961	0	-0.0007846
1	713.1515	0.4222743	126.2	0.4222743	0	-0.000809599
1	715.1246	0.4222743	126.4	0.4222743	0	-0.001033144
1	717.1257	0.4222743	126.6	0.4222743	0	-0.000847736
1	718.8157	0.4222743	126.8	0.4222743	0	-0.001043654
1	720.9891	0.4250524	127	0.4250524	0	-0.001051479
1	723.0022	0.4250524	127.2	0.4250524	0	-0.001013329
1	724.8333	0.4250524	127.4	0.4250524	0	-0.000955152
1	726.9967	0.4250524	127.6	0.4250524	0	-0.001019041
1	728.9	0.4278305	127.8	0.4278305	0	-0.000999509
1	730.8	0.4278305	128	0.4278305	0	-0.000982813
1	732.2861	0.4278305	128.2	0.4278305	0	-0.000965866
1	734.6727	0.4278305	128.4	0.4278305	0	-0.000946796
1	736.702	0.4278305	128.6	0.4278305	0	-0.000929778
1	738.2805	0.4306086	128.8	0.4306086	0	-0.000916834
1	740.1845	0.4306086	129	0.4306086	0	-0.000865373
1	742.3891	0.4306086	129.2	0.4306086	0	-0.000830485
1	743.8538	0.4306086	129.4	0.4306086	0	-0.000682849
1	746.0552	0.4333867	129.6	0.4333867	0	-0.00068581
1	748.1115	0.4333867	129.8	0.4333867	0	-0.00076657
1	749.7711	0.4333867	130	0.4333867	0	-0.000700332
1	752.1377	0.4333867	130.2	0.4333867	0	-0.000668905
1	753.8677	0.4361649	130.4	0.4361649	0	-0.000650715
1	755.8459	0.4361649	130.6	0.4361649	0	-0.000884896
1	757.4009	0.4361649	130.8	0.4361649	0	-0.000783719
1	759.5685	0.4361649	131	0.4361649	0	-0.000933739
1	761.4106	0.438943	131.2	0.438943	0	-0.000983096
1	763.2611	0.438943	131.4	0.438943	0	-0.001024196
1	765.3012	0.438943	131.6	0.438943	0	-0.001354546
1	767.4185	0.438943	131.8	0.438943	0	-0.001184264
1	769.1402	0.4417211	132	0.4417211	0	-0.001236711
1	770.8925	0.4417211	132.2	0.4417211	0	-0.001229641
1	772.944	0.4417211	132.4	0.4417211	0	-0.00118466
1	774.5609	0.4417211	132.6	0.4417211	0	-0.001181756
1	776.3441	0.4444992	132.8	0.4444992	0	-0.001172541
1	778.2961	0.4444992	133	0.4444992	0	-0.000825433
1	779.8655	0.4444992	133.2	0.4444992	0	-0.000992731
1	781.9494	0.4444992	133.4	0.4444992	0	-0.001170865
1	783.6085	0.4444992	133.6	0.4444992	0	-0.001070001
1	785.6809	0.4472773	133.8	0.4472773	0	-0.001057742
1	787.6894	0.4472773	134	0.4472773	0	-0.001056987
1	789.4511	0.4472773	134.2	0.4472773	0	-0.00102815
1	791.5788	0.4472773	134.4	0.4472773	0	-0.00107259
1	793.3679	0.4500555	134.6	0.4500555	0	-0.001141657
1	795.0497	0.4500555	134.8	0.4500555	0	-0.00137119
1	797.2265	0.4500555	135	0.4500555	0	-0.000750394
1	799.1046	0.4500555	135.2	0.4500555	0	-0.000835439
1	801.1135	0.4528336	135.4	0.4528336	0	-0.001030412
1	803.0125	0.4528336	135.6	0.4528336	0	-0.001177835
1	805.1906	0.4528336	135.8	0.4528336	0	-0.001141071
1	807.2743	0.4528336	136	0.4528336	0	-0.001128315
1	809.0908	0.4556117	136.2	0.4556117	0	-0.001095555
1	811.3764	0.4556117	136.4	0.4556117	0	-0.001022639
1	813.3137	0.4556117	136.6	0.4556117	0	-0.000960884
1	815.086	0.4556117	136.8	0.4556117	0	-0.00108533
1	817.2685	0.4583898	137	0.4583898	0	-0.001171698
1	819.0313	0.4583898	137.2	0.4583898	0	-0.001032644
1	820.9261	0.4583898	137.4	0.4583898	0	-0.000841245
1	823.2234	0.4583898	137.6	0.4583898	0	-0.000975653
1	824.8366	0.4611679	137.8	0.4611679	0	-0.000940155
1	827.2726	0.4611679	138	0.4611679	0	-0.000967197
1	829.2066	0.4611679	138.2	0.4611679	0	-0.000974533
1	831.1487	0.4611679	138.4	0.4611679	0	-0.000909537
1	833.1463	0.463946	138.6	0.463946	0	-0.000890007
1	835.1262	0.463946	138.8	0.463946	0	-0.000920095
1	836.5674	0.463946	139	0.463946	0	-0.000908193
1	838.6804	0.463946	139.2	0.463946	0	-0.000917363
1	840.5363	0.463946	139.4	0.463946	0	-0.000939859
1	842.4517	0.4667242	139.6	0.4667242	0	-0.00092523
1	844.1336	0.4667242	139.8	0.4667242	0	-0.000929698
1	846.325	0.4667242	140	0.4667242	0	-0.000966977
1	847.8593	0.4667242	140.2	0.4667242	0	-0.001007973
1	849.8184	0.4695023	140.4	0.4695023	0	-0.001115764
1	851.4353	0.4695023	140.6	0.4695023	0	-0.001174414
1	852.8752	0.4695023	140.8	0.4695023	0	-0.001230073
1	854.5512	0.4695023	141	0.4695023	0	-0.001293851
1	856.4218	0.4722804	141.2	0.4722804	0	-0.001336853
1	858.1002	0.4722804	141.4	0.4722804	0	-0.001318554
1	859.9459	0.4722804	141.6	0.4722804	0	-0.001291462
1	861.7745	0.4722804	141.8	0.4722804	0	-0.001289245
1	863.5912	0.4750585	142	0.4750585	0	-0.001294642
1	866.2914	0.4750585	142.2	0.4750585	0	-0.001315254
1	867.8663	0.4750585	142.4	0.4750585	0	-0.001313654
1	854.3711	0.4750585	142.6	0.4750585	0	-0.00132161
1	836.5262	0.4778367	142.8	0.4778367	0	-0.001302651
1	841.2138	0.4778367	143	0.4778367	0	-0.001337625
1	844.7765	0.4778367	143.2	0.4778367	0	-0.001430717
1	847.7194	0.4778367	143.4	0.4778367	0	-0.001408606
1	813.2891	0.4806148	143.6	0.4806148	0	-0.001529854
1	783.9894	0.4806148	143.8	0.4806148	0	-0.001519205
1	786.6017	0.4806148	144	0.4806148	0	-0.001438124
1	793.3726	0.4806148	144.2	0.4806148	0	-0.001391746
1	799.6234	0.4806148	144.4	0.4806148	0	-0.001317322
1	801.8507	0.4833929	144.6	0.4833929	0	-0.001308838
1	803.736	0.4833929	144.8	0.4833929	0	-0.001396578
1	802.3145	0.4833929	145	0.4833929	0	-0.001362526
1	800.4407	0.4833929	145.2	0.4833929	0	-0.001337831
1	803.3202	0.486171	145.4	0.486171	0	-0.001289623
1	806.1223	0.486171	145.6	0.486171	0	-0.00128071
1	808.6141	0.486171	145.8	0.486171	0	-0.001211282
1	811.7126	0.486171	146	0.486171	0	-0.001292946
1	814.3914	0.4889491	146.2	0.4889491	0	-0.001278272
1	817.7598	0.4889491	146.4	0.4889491	0	-0.001222416
1	820.7042	0.4889491	146.6	0.4889491	0	-0.001184718
1	823.1915	0.4889491	146.8	0.4889491	0	-0.001166743
1	826.3046	0.4917273	147	0.4917273	0	-0.001007493
1	829.5033	0.4917273	147.2	0.4917273	0	-0.001026016
1	832.1371	0.4917273	147.4	0.4917273	0	-0.001002719
1	834.9497	0.4917273	147.6	0.4917273	0	-0.001036065
1	837.7761	0.4945054	147.8	0.4945054	0	-0.001038643
1	840.5397	0.4945054	148	0.4945054	0	-0.001062271
1	843.1979	0.4945054	148.2	0.4945054	0	-0.001171007
1	845.9018	0.4945054	148.4	0.4945054	0	-0.001176949
1	848.778	0.4972835	148.6	0.4972835	0	-0.001081338
1	851.2955	0.4972835	148.8	0.4972835	0	-0.001066685
1	853.994	0.4972835	149	0.4972835	0	-0.000955328
1	856.5383	0.4972835	149.2	0.4972835	0	-0.000931237
1	858.8725	0.4972835	149.4	0.4972835	0	-0.001070526
1	861.3392	0.5000616	149.6	0.5000616	0	-0.001361682
1	863.729	0.5000616	149.8	0.5000616	0	-0.001258755
1	866.1711	0.5000616	150	0.5000616	0	-0.001329479
1	868.6783	0.5000616	150.2	0.5000616	0	-0.001239001
1	870.973	0.5028397	150.4	0.5028397	0	-0.001173725
1	873.9499	0.5028397	150.6	0.5028397	0	-0.001189084
1	875.9023	0.5028397	150.8	0.5028397	0	-0.001144826
1	877.7877	0.5028397	151	0.5028397	0	-0.001226186
1	880.3511	0.5056179	151.2	0.5056179	0	-0.001251033
1	881.9218	0.5056179	151.4	0.5056179	0	-0.001369711
1	883.8653	0.5056179	151.6	0.5056179	0	-0.001336699
1	886.1949	0.5056179	151.8	0.5056179	0	-0.001278932
1	887.7089	0.508396	152	0.508396	0	-0.00130104
1	889.4863	0.508396	152.2	0.508396	0	-0.001331993
1	891.9301	0.508396	152.4	0.508396	0	-0.001325252
1	893.6815	0.508396	152.6	0.508396	0	-0.001321008
1	896.1346	0.5111741	152.8	0.5111741	0	-0.001291185
1	897.7647	0.5111741	153	0.5111741	0	-0.001270026
1	899.7714	0.5111741	153.2	0.5111741	0	-0.001261216
1	901.5241	0.5111741	153.4	0.5111741	0	-0.001259736
1	903.7172	0.5139522	153.6	0.5139522	0	-0.001222242
1	906.0569	0.5139522	153.8	0.5139522	0	-0.001220876
1	907.3194	0.5139522	154	0.5139522	0	-0.00117087
1	909.8027	0.5139522	154.2	0.5139522	0	-0.001059454
1	912.1005	0.5167304	154.4	0.5167304	0	-0.001135608
1	913.5366	0.5167304	154.6	0.5167304	0	-0.001272082
1	915.8828	0.5167304	154.8	0.5167304	0	-0.001183945
1	918.1391	0.5167304	155	0.5167304	0	-0.001294041
1	920.1617	0.5167304	155.2	0.5167304	0	-0.001325684
1	922.2644	0.5195085	155.4	0.5195085	0	-0.001302051
1	924.038	0.5195085	155.6	0.5195085	0	-0.001256667
1	926.5002	0.5195085	155.8	0.5195085	0	-0.001294551
1	928.2459	0.5195085	156	0.5195085	0	-0.001312105
1	930.0488	0.5222866	156.2	0.5222866	0	-0.00133334
1	932.5393	0.5222866	156.4	0.5222866	0	-0.001335493
1	934.5649	0.5222866	156.6	0.5222866	0	-0.001362215
1	936.4185	0.5222866	156.8	0.5222866	0	-0.001353736
1	938.597	0.5250647	157	0.5250647	0	-0.001372186
1	940.7637	0.5250647	157.2	0.5250647	0	-0.001372582
1	942.6107	0.5250647	157.4	0.5250647	0	-0.001226406
1	944.0109	0.5250647	157.6	0.5250647	0	-0.001207226
1	946.3029	0.5278428	157.8	0.5278428	0	-0.001321553
1	948.3245	0.5278428	158	0.5278428	0	-0.001394977
1	950.3188	0.5278428	158.2	0.5278428	0	-0.001286297
1	952.4455	0.5278428	158.4	0.5278428	0	-0.001260202
1	954.7135	0.5306209	158.6	0.5306209	0	-0.001262426
1	956.4349	0.5306209	158.8	0.5306209	0	-0.001240986
1	958.6794	0.5306209	159	0.5306209	0	-0.00113016
1	960.8294	0.5306209	159.2	0.5306209	0	-0.000858115
1	962.3727	0.533399	159.4	0.533399	0	-0.000989035
1	964.5148	0.533399	159.6	0.533399	0	-0.000996626
1	966.1822	0.533399	159.8	0.533399	0	-0.001278798
1	968.0094	0.533399	160	0.533399	0	-0.001277876
1	969.9602	0.533399	160.2	0.533399	0	-0.001363001
1	971.2637	0.5361772	160.4	0.5361772	0	-0.001503855
1	972.9592	0.5361772	160.6	0.5361772	0	-0.001474157
1	974.7698	0.5361772	160.8	0.5361772	0	-0.001489093
1	976.2049	0.5361772	161	0.5361772	0	-0.001430218
1	978.2635	0.5389553	161.2	0.5389553	0	-0.001484688
1	980.152	0.5389553	161.4	0.5389553	0	-0.00152221
1	982.1744	0.5389553	161.6	0.5389553	0	-0.001534131
1	984.0562	0.5389553	161.8	0.5389553	0	-0.001512129
1	985.7142	0.5417334	162	0.5417334	0	-0.001174697
1	987.8459	0.5417334	162.2	0.5417334	0	-0.001268122
1	990.1347	0.5417334	162.4	0.5417334	0	-0.001249274
1	991.8599	0.5417334	162.6	0.5417334	0	-0.001257531
1	994.2608	0.5445116	162.8	0.5445116	0	-0.001388173
1	995.9963	0.5445116	163	0.5445116	0	-0.001503309
1	998.5391	0.5445116	163.2	0.5445116	0	-0.001472386
1	1000.466	0.5445116	163.4	0.5445116	0	-0.001508627
1	1002.34	0.5472897	163.6	0.5472897	0	-0.001447288
1	1004.438	0.5472897	163.8	0.5472897	0	-0.001463804
1	1006.018	0.5472897	164	0.5472897	0	-0.001463721
1	1007.702	0.5472897	164.2	0.5472897	0	-0.001487387
1	1009.935	0.5500678	164.4	0.5500678	0	-0.001454431
1	1012.059	0.5500678	164.6	0.5500678	0	-0.001407708
1	1013.948	0.5500678	164.8	0.5500678	0	-0.001411647
1	1013.153	0.5500678	165	0.5500678	0	-0.001312258
1	1007.82	0.5500678	165.2	0.5500678	0	-0.00136069
1	1009.836	0.5528459	165.4	0.5528459	0	-0.00134116
1	1011.649	0.5528459	165.6	0.5528459	0	-0.001300926
1	1012.997	0.5528459	165.8	0.5528459	0	-0.001252563
1	1014.789	0.5528459	166	0.5528459	0	-0.001166783
1	1016.68	0.555624	166.2	0.555624	0	-0.001220595
1	1016.31	0.555624	166.4	0.555624	0	-0.001213846
1	1015.108	0.555624	166.6	0.555624	0	-0.0012189
1	893.5771	0.5584021	166.8	0.5584021	0	-0.001211933
1	860.5792	0.5584021	167	0.5584021	0	-0.001305686
1	860.6152	0.5584021	167.2	0.5584021	0	-0.001259479
1	866.5138	0.5584021	167.4	0.5584021	0	-0.001391376
1	878.0677	0.5584021	167.6	0.5584021	0	-0.001317359
1	877.7166	0.5611802	167.8	0.5611802	0	-0.001331065
1	873.9011	0.5611802	168	0.5611802	0	-0.001336168
1	879.2426	0.5611802	168.2	0.5611802	0	-0.001345333
1	885.1935	0.5611802	168.4	0.5611802	0	-0.00131698
1	887.9305	0.5639584	168.6	0.5639584	0	-0.001303311
1	889.9573	0.5639584	168.8	0.5639584	0	-0.001181388
1	892.2131	0.5639584	169	0.5639584	0	-0.001059427
1	894.6082	0.5639584	169.2	0.5639584	0	-0.001185174
1	896.0806	0.5667365	169.4	0.5667365	0	-0.001187103
1	897.6367	0.5667365	169.6	0.5667365	0	-0.001167662
1	899.2668	0.5667365	169.8	0.5667365	0	-0.001244703
1	900.9723	0.5667365	170	0.5667365	0	-0.001166685
1	902.8221	0.5667365	170.2	0.5667365	0	-0.001173948
1	904.1636	0.5695146	170.4	0.5695146	0	-0.001200801
1	906.983	0.5695146	170.6	0.5695146	0	-0.001249062
1	909.0459	0.5695146	170.8	0.5695146	0	-0.001236332
1	911.488	0.5695146	171	0.5695146	0	-0.001245893
1	914.5419	0.5722927	171.2	0.5722927	0	-0.00122622
1	916.8253	0.5722927	171.4	0.5722927	0	-0.001217917
1	918.9545	0.5722927	171.6	0.5722927	0	-0.001209344
1	920.7757	0.5722927	171.8	0.5722927	0	-0.0010749
1	922.4512	0.5750709	172	0.5750709	0	-0.00105146
1	924.5974	0.5750709	172.2	0.5750709	0	-0.000995233
1	926.6908	0.5750709	172.4	0.5750709	0	-0.001097422
1	928.8068	0.5750709	172.6	0.5750709	0	-0.001074765
1	930.7744	0.577849	172.8	0.577849	0	-0.001109042
1	932.3554	0.577849	173	0.577849	0	-0.001273718
1	934.6613	0.577849	173.2	0.577849	0	-0.001274799
1	937.2109	0.577849	173.4	0.577849	0	-0.001320464
1	939.2728	0.5806271	173.6	0.5806271	0	-0.001186642
1	941.7525	0.5806271	173.8	0.5806271	0	-0.001228877
1	944.147	0.5806271	174	0.5806271	0	-0.001227258
1	946.1234	0.5806271	174.2	0.5806271	0	-0.001156735
1	948.5154	0.5834052	174.4	0.5834052	0	-0.001215563
1	950.9222	0.5834052	174.6	0.5834052	0	-0.00120245
1	953.7613	0.5834052	174.8	0.5834052	0	-0.001189515
1	956	0.5834052	175	0.5834052	0	-0.001164549
1	958.3709	0.5861834	175.2	0.5861834	0	-0.001212707
1	961.0125	0.5861834	175.4	0.5861834	0	-0.001161515
1	963.4998	0.5861834	175.6	0.5861834	0	-0.001128691
1	965.5991	0.5861834	175.8	0.5861834	0	-0.001026779
1	966.3739	0.5861834	176	0.5861834	0	-0.000970098
1	965.5571	0.5889615	176.2	0.5889615	0	-0.001051546
1	967.0334	0.5889615	176.4	0.5889615	0	-0.001056434
1	967.532	0.5889615	176.6	0.5889615	0	-0.00108184
1	967.6604	0.5889615	176.8	0.5889615	0	-0.001214357
1	969.4741	0.5917396	177	0.5917396	0	-0.001254301
1	970.8705	0.5917396	177.2	0.5917396	0	-0.001228366
1	972.3807	0.5917396	177.4	0.5917396	0	-0.001153672
1	972.0927	0.5917396	177.6	0.5917396	0	-0.001177202
1	964.324	0.5945177	177.8	0.5945177	0	-0.001232311
1	948.7589	0.5945177	178	0.5945177	0	-0.001250158
1	951.5051	0.5945177	178.2	0.5945177	0	-0.001322717
1	953.3721	0.5945177	178.4	0.5945177	0	-0.001298377
1	956.0211	0.5972958	178.6	0.5972958	0	-0.001205693
1	958.437	0.5972958	178.8	0.5972958	0	-0.001123488
1	960.8923	0.5972958	179	0.5972958	0	-0.001098702
1	963.1393	0.5972958	179.2	0.5972958	0	-0.001151088
1	966.5406	0.6000739	179.4	0.6000739	0	-0.001419693
1	969.1659	0.6000739	179.6	0.6000739	0	-0.001309529
1	971.2957	0.6000739	179.8	0.6000739	0	-0.001359533
1	974.8513	0.6000739	180	0.6000739	0	-0.001369622
1	977.0064	0.602852	180.2	0.602852	0	-0.001310821
1	979.3347	0.602852	180.4	0.602852	0	-0.001350071
1	982.6469	0.602852	180.6	0.602852	0	-0.001357132
1	983.7392	0.602852	180.8	0.602852	0	-0.001373594
1	986.3817	0.602852	181	0.602852	0	-0.001326187
1	989.0223	0.6056302	181.2	0.6056302	0	-0.001348068
1	990.9338	0.6056302	181.4	0.6056302	0	-0.001338027
1	955.3813	0.6056302	181.6	0.6056302	0	-0.001316034
1	906.9122	0.6084083	181.8	0.6084083	0	-0.001288005
1	899.091	0.6084083	182	0.6084083	0	-0.001299422
1	902.2442	0.6084083	182.2	0.6084083	0	-0.00131345
1	909.4681	0.6084083	182.4	0.6084083	0	-0.001296105
1	913.9871	0.6084083	182.6	0.6084083	0	-0.001313007
1	915.6785	0.6111864	182.8	0.6111864	0	-0.001298143
1	915.7871	0.6111864	183	0.6111864	0	-0.00130674
1	916.7064	0.6111864	183.2	0.6111864	0	-0.001336213
1	917.7421	0.6111864	183.4	0.6111864	0	-0.001344687
1	919.0131	0.6139646	183.6	0.6139646	0	-0.001292698
1	920.1706	0.6139646	183.8	0.6139646	0	-0.001286221
1	921.2003	0.6139646	184	0.6139646	0	-0.001299746
1	922.5066	0.6139646	184.2	0.6139646	0	-0.001309672
1	924.5434	0.6167427	184.4	0.6167427	0	-0.001347565
1	925.9399	0.6167427	184.6	0.6167427	0	-0.001478952
1	927.938	0.6167427	184.8	0.6167427	0	-0.001422326
1	929.6779	0.6167427	185	0.6167427	0	-0.001129098
1	931.5014	0.6195208	185.2	0.6195208	0	-0.001081285
1	933.3627	0.6195208	185.4	0.6195208	0	-0.001153415
1	932.1152	0.6195208	185.6	0.6195208	0	-0.001146873
1	886.3102	0.6195208	185.8	0.6195208	0	-0.001190518
1	866.3079	0.6195208	186	0.6195208	0	-0.001245483
1	868.8969	0.6222989	186.2	0.6222989	0	-0.001211532
1	856.6615	0.6222989	186.4	0.6222989	0	-0.00131142
1	832.0274	0.6222989	186.6	0.6222989	0	-0.001346362
1	834.3329	0.6222989	186.8	0.6222989	0	-0.001310903
1	838.7234	0.625077	187	0.625077	0	-0.001422429
1	842.9276	0.625077	187.2	0.625077	0	-0.001371278
1	845.0565	0.625077	187.4	0.625077	0	-0.001394815
1	846.8284	0.625077	187.6	0.625077	0	-0.001386056
1	848.909	0.6278551	187.8	0.6278551	0	-0.001404879
1	851.0864	0.6278551	188	0.6278551	0	-0.001386611
1	852.4419	0.6278551	188.2	0.6278551	0	-0.00127966
1	854.49	0.6278551	188.4	0.6278551	0	-0.001263793
1	856.9238	0.6306332	188.6	0.6306332	0	-0.001209838
1	859.0554	0.6306332	188.8	0.6306332	0	-0.001292844
1	861.0999	0.6306332	189	0.6306332	0	-0.001312072
1	863.3781	0.6306332	189.2	0.6306332	0	-0.001582622
1	865.2549	0.6334114	189.4	0.6334114	0	-0.001374702
1	866.0322	0.6334114	189.6	0.6334114	0	-0.001001479
1	857.3336	0.6334114	189.8	0.6334114	0	-0.001281987
1	848.1037	0.6334114	190	0.6334114	0	-0.001135933
1	843.799	0.6361895	190.2	0.6361895	0	-0.001187625
1	843.0837	0.6361895	190.4	0.6361895	0	-0.001293811
1	843.3547	0.6361895	190.6	0.6361895	0	-0.001286696
1	841.7553	0.6361895	190.8	0.6361895	0	-0.001344335
1	835.0665	0.6389676	191	0.6389676	0	-0.001389091
1	830.0692	0.6389676	191.2	0.6389676	0	-0.001290824
1	828.8851	0.6389676	191.4	0.6389676	0	-0.000989344
1	829.3588	0.6389676	191.6	0.6389676	0	-0.000910635
1	829.8326	0.6389676	191.8	0.6389676	0	-0.00100335
1	828.5877	0.6417457	192	0.6417457	0	-0.001208141
1	818.8417	0.6417457	192.2	0.6417457	0	-0.001109611
1	810.9711	0.6417457	192.4	0.6417457	0	-0.001091198
1	808.2449	0.6417457	192.6	0.6417457	0	-0.001051085
1	808.7314	0.6445239	192.8	0.6445239	0	-0.00102489
1	809.6797	0.6445239	193	0.6445239	0	-0.001013946
1	811.2725	0.6445239	193.2	0.6445239	0	-0.000948283
1	812.4014	0.6445239	193.4	0.6445239	0	-0.000913646
1	814.1744	0.647302	193.6	0.647302	0	-0.000976005
1	816.0594	0.647302	193.8	0.647302	0	-0.000951143
1	818.1339	0.647302	194	0.647302	0	-0.000921965
1	819.0477	0.647302	194.2	0.647302	0	-0.000954176
1	820.1703	0.6500801	194.4	0.6500801	0	-0.000953437
1	820.2762	0.6500801	194.6	0.6500801	0	-0.000945159
1	820.0422	0.6500801	194.8	0.6500801	0	-0.000926727
1	819.3027	0.6500801	195	0.6500801	0	-0.00078401
1	819.6799	0.6528582	195.2	0.6528582	0	-0.000874773
1	818.4295	0.6528582	195.4	0.6528582	0	-0.000757806
1	818.5678	0.6528582	195.6	0.6528582	0	-0.000729017
1	819.7565	0.6528582	195.8	0.6528582	0	-0.000782801
1	821.1024	0.6556364	196	0.6556364	0	-0.000800294
1	821.3022	0.6556364	196.2	0.6556364	0	-0.000817475
1	818.2811	0.6556364	196.4	0.6556364	0	-0.00095558
1	810.3232	0.6556364	196.6	0.6556364	0	-0.001000227
1	804.4318	0.6556364	196.8	0.6556364	0	-0.001020808
1	796.3989	0.6584145	197	0.6584145	0	-0.001055781
1	773.5709	0.6584145	197.2	0.6584145	0	-0.000990812
1	774.6498	0.6584145	197.4	0.6584145	0	-0.00100913
1	775.7885	0.6584145	197.6	0.6584145	0	-0.001041063
1	777.2917	0.6611926	197.8	0.6611926	0	-0.001047733
1	777.0288	0.6611926	198	0.6611926	0	-0.001045145
1	765.285	0.6611926	198.2	0.6611926	0	-0.001051668
1	748.5044	0.6611926	198.4	0.6611926	0	-0.001042347
1	743.2689	0.6639707	198.6	0.6639707	0	-0.001035456
1	745.8306	0.6639707	198.8	0.6639707	0	-0.001029484
1	747.7438	0.6639707	199	0.6639707	0	-0.001051628
1	748.1044	0.6639707	199.2	0.6639707	0	-0.001047535
1	748.2842	0.6667488	199.4	0.6667488	0	-0.001051538
1	749.42	0.6667488	199.6	0.6667488	0	-0.001060459
1	749.7495	0.6667488	199.8	0.6667488	0	-0.001046219
1	750.9692	0.6667488	200	0.6667488	0	-0.001035659
1	751.8384	0.6695269	200.2	0.6695269	0	-0.001014251
1	752.9211	0.6695269	200.4	0.6695269	0	-0.000885132
1	751.9268	0.6695269	200.6	0.6695269	0	-0.000887312
1	748.1821	0.6695269	200.8	0.6695269	0	-0.000952417
1	744.2491	0.672305	201	0.672305	0	-0.000960485
1	741.9585	0.672305	201.2	0.672305	0	-0.001030298
1	741.5722	0.672305	201.4	0.672305	0	-0.000957099
1	741.2288	0.672305	201.6	0.672305	0	-0.000960102
1	740.2614	0.672305	201.8	0.672305	0	-0.000988783
1	737.9697	0.6750832	202	0.6750832	0	-0.001007792
1	737.9797	0.6750832	202.2	0.6750832	0	-0.001011563
1	738.2749	0.6750832	202.4	0.6750832	0	-0.001008352
1	739.1824	0.6750832	202.6	0.6750832	0	-0.001007372
1	740.5569	0.6778613	202.8	0.6778613	0	-0.001030571
1	742.2016	0.6778613	203	0.6778613	0	-0.001059451
1	743.4269	0.6778613	203.2	0.6778613	0	-0.001031025
1	745.1769	0.6778613	203.4	0.6778613	0	-0.000792008
1	746.847	0.6806394	203.6	0.6806394	0	-0.001018052
1	748.4523	0.6806394	203.8	0.6806394	0	-0.001081713
1	749.738	0.6806394	204	0.6806394	0	-0.001061483
1	751.6514	0.6806394	204.2	0.6806394	0	-0.001012317
1	753.5519	0.6834176	204.4	0.6834176	0	-0.00080506
1	755.0287	0.6834176	204.6	0.6834176	0	-0.00094155
1	756.5306	0.6834176	204.8	0.6834176	0	-0.001005708
1	755.7109	0.6834176	205	0.6834176	0	-0.001046462
1	753.8753	0.6861957	205.2	0.6861957	0	-0.001193953
1	754.1444	0.6861957	205.4	0.6861957	0	-0.001215811
1	754.9556	0.6861957	205.6	0.6861957	0	-0.001190572
1	755.9095	0.6861957	205.8	0.6861957	0	-0.001139779
1	756.7397	0.6889738	206	0.6889738	0	-0.001150526
1	757.7622	0.6889738	206.2	0.6889738	0	-0.00116464
1	758.9269	0.6889738	206.4	0.6889738	0	-0.001134186
1	759.4844	0.6889738	206.6	0.6889738	0	-0.001043387
1	761.0532	0.6917519	206.8	0.6917519	0	-0.001078043
1	762.0345	0.6917519	207	0.6917519	0	-0.001093167
1	761.569	0.6917519	207.2	0.6917519	0	-0.001113528
1	761.3743	0.6917519	207.4	0.6917519	0	-0.001104504
1	761.4085	0.6917519	207.6	0.6917519	0	-0.001215432
1	761.3594	0.69453	207.8	0.69453	0	-0.001229165
1	761.6218	0.69453	208	0.69453	0	-0.001210183
1	761.5989	0.69453	208.2	0.69453	0	-0.001218747
1	758.3549	0.69453	208.4	0.69453	0	-0.001046453
1	750.821	0.6973081	208.6	0.6973081	0	-0.001209175
1	745.9241	0.6973081	208.8	0.6973081	0	-0.001202295
1	744.8787	0.6973081	209	0.6973081	0	-0.001208485
1	743.6433	0.6973081	209.2	0.6973081	0	-0.001200102
1	740.4486	0.7000863	209.4	0.7000863	0	-0.001187122
1	739.8833	0.7000863	209.6	0.7000863	0	-0.001156261
1	739.6856	0.7000863	209.8	0.7000863	0	-0.001133968
1	739.9204	0.7000863	210	0.7000863	0	-0.001172178
1	740.1684	0.7028644	210.2	0.7028644	0	-0.001176946
1	740.2914	0.7028644	210.4	0.7028644	0	-0.001210605
1	740.4852	0.7028644	210.6	0.7028644	0	-0.001323211
1	739.7867	0.7028644	210.8	0.7028644	0	-0.001319447
1	739.2311	0.7056425	211	0.7056425	0	-0.001315101
1	737.5177	0.7056425	211.2	0.7056425	0	-0.001275852
1	736.8369	0.7056425	211.4	0.7056425	0	-0.001292274
1	737.1224	0.7056425	211.6	0.7056425	0	-0.001296396
1	736.3726	0.7056425	211.8	0.7056425	0	-0.001306284
1	736.9767	0.7084206	212	0.7084206	0	-0.001296916
1	736.8917	0.7084206	212.2	0.7084206	0	-0.001292938
1	732.4873	0.7084206	212.4	0.7084206	0	-0.001278012
1	725.4435	0.7084206	212.6	0.7084206	0	-0.001264344
1	721.8493	0.7111987	212.8	0.7111987	0	-0.001245968
1	717.6688	0.7111987	213	0.7111987	0	-0.001141882
1	715.5231	0.7111987	213.2	0.7111987	0	-0.00122268
1	712.9398	0.7111987	213.4	0.7111987	0	-0.001194607
1	711.6695	0.7139769	213.6	0.7139769	0	-0.001168606
1	708.4204	0.7139769	213.8	0.7139769	0	-0.001141796
1	707.2538	0.7139769	214	0.7139769	0	-0.001187915
1	706.8929	0.7139769	214.2	0.7139769	0	-0.00120966
1	707.6429	0.716755	214.4	0.716755	0	-0.001303836
1	709.0599	0.716755	214.6	0.716755	0	-0.001392246
1	709.4089	0.716755	214.8	0.716755	0	-0.00128178
1	710.3717	0.716755	215	0.716755	0	-0.001292047
1	705.7539	0.7195331	215.2	0.7195331	0	-0.001312163
1	701.3609	0.7195331	215.4	0.7195331	0	-0.001350714
1	700.4162	0.7195331	215.6	0.7195331	0	-0.001332557
1	700.0629	0.7195331	215.8	0.7195331	0	-0.001321327
1	700.6991	0.7223112	216	0.7223112	0	-0.001274952
1	700.6592	0.7223112	216.2	0.7223112	0	-0.001248698
1	700.5829	0.7223112	216.4	0.7223112	0	-0.001162294
1	700.3062	0.7223112	216.6	0.7223112	0	-0.00114
1	700.6251	0.7250894	216.8	0.7250894	0	-0.001223135
1	695.5543	0.7250894	217	0.7250894	0	-0.001224951
1	692.4132	0.7250894	217.2	0.7250894	0	-0.001315765
1	692.6565	0.7250894	217.4	0.7250894	0	-0.001308374
1	692.874	0.7278675	217.6	0.7278675	0	-0.001268684
1	694.0644	0.7278675	217.8	0.7278675	0	-0.001280235
1	695.0971	0.7278675	218	0.7278675	0	-0.00130397
1	696.1706	0.7278675	218.2	0.7278675	0	-0.001314005
1	697.6427	0.7278675	218.4	0.7278675	0	-0.001292303
1	698.8514	0.7306456	218.6	0.7306456	0	-0.00129403
1	700.3013	0.7306456	218.8	0.7306456	0	-0.001282758
1	702.0402	0.7306456	219	0.7306456	0	-0.001352895
1	703.637	0.7306456	219.2	0.7306456	0	-0.001476189
1	705.2256	0.7334237	219.4	0.7334237	0	-0.001358812
1	706.4329	0.7334237	219.6	0.7334237	0	-0.00119496
1	707.2231	0.7334237	219.8	0.7334237	0	-0.00133466
1	707.3268	0.7334237	220	0.7334237	0	-0.001258185
1	707.4119	0.7362018	220.2	0.7362018	0	-0.001283363
1	707.7383	0.7362018	220.4	0.7362018	0	-0.001351339
1	709.0497	0.7362018	220.6	0.7362018	0	-0.001301902
1	709.618	0.7362018	220.8	0.7362018	0	-0.001253058
1	710.3177	0.7389799	221	0.7389799	0	-0.001267112
1	710.312	0.7389799	221.2	0.7389799	0	-0.001258976
1	710.1686	0.7389799	221.4	0.7389799	0	-0.001263989
1	710.7057	0.7389799	221.6	0.7389799	0	-0.00125205
1	711.0292	0.741758	221.8	0.741758	0	-0.001235484
1	710.8896	0.741758	222	0.741758	0	-0.001219921
1	708.7971	0.741758	222.2	0.741758	0	-0.0011788
1	706.559	0.741758	222.4	0.741758	0	-0.001090748
1	703.6995	0.7445362	222.6	0.7445362	0	-0.001165258
1	697.0153	0.7445362	222.8	0.7445362	0	-0.00117868
1	691.5654	0.7445362	223	0.7445362	0	-0.001190617
1	689.8555	0.7445362	223.2	0.7445362	0	-0.001323374
1	688.3688	0.7445362	223.4	0.7445362	0	-0.001356742
1	688.3518	0.7473143	223.6	0.7473143	0	-0.001360151
1	687.0645	0.7473143	223.8	0.7473143	0	-0.001256817
1	683.4367	0.7473143	224	0.7473143	0	-0.001278244
1	681.1662	0.7473143	224.2	0.7473143	0	-0.00116394
1	680.2615	0.7500924	224.4	0.7500924	0	-0.001128651
1	680.6531	0.7500924	224.6	0.7500924	0	-0.001222981
1	675.2814	0.7500924	224.8	0.7500924	0	-0.001228563
1	669.8362	0.7500924	225	0.7500924	0	-0.00121194
1	669.3839	0.7528706	225.2	0.7528706	0	-0.001349324
1	670.4171	0.7528706	225.4	0.7528706	0	-0.001399931
1	671.8092	0.7528706	225.6	0.7528706	0	-0.001388056
1	672.8373	0.7528706	225.8	0.7528706	0	-0.001412065
1	674.2078	0.7556487	226	0.7556487	0	-0.001357024
1	676.0538	0.7556487	226.2	0.7556487	0	-0.001362342
1	676.5912	0.7556487	226.4	0.7556487	0	-0.001352983
1	676.9964	0.7556487	226.6	0.7556487	0	-0.001261116
1	677.8353	0.7584268	226.8	0.7584268	0	-0.001343259
1	678.5339	0.7584268	227	0.7584268	0	-0.001353128
1	678.728	0.7584268	227.2	0.7584268	0	-0.001348795
1	679.8766	0.7584268	227.4	0.7584268	0	-0.001441075
1	680.9697	0.7612049	227.6	0.7612049	0	-0.001347137
1	680.9722	0.7612049	227.8	0.7612049	0	-0.001349648
1	680.2198	0.7612049	228	0.7612049	0	-0.001382991
1	679.7375	0.7612049	228.2	0.7612049	0	-0.001419765
1	680.3613	0.763983	228.4	0.763983	0	-0.001407294
1	680.0005	0.763983	228.6	0.763983	0	-0.001371904
1	680.2632	0.763983	228.8	0.763983	0	-0.001361593
1	681.1931	0.763983	229	0.763983	0	-0.001352852
1	682.4719	0.763983	229.2	0.763983	0	-0.001378626
1	683.5733	0.7667611	229.4	0.7667611	0	-0.001432283
1	685.0794	0.7667611	229.6	0.7667611	0	-0.001384268
1	686.1998	0.7667611	229.8	0.7667611	0	-0.001269417
1	687.2061	0.7667611	230	0.7667611	0	-0.001373652
1	688.0103	0.7695393	230.2	0.7695393	0	-0.001575397
1	688.7737	0.7695393	230.4	0.7695393	0	-0.001731514
1	689.4792	0.7695393	230.6	0.7695393	0	-0.001637792
1	689.4457	0.7695393	230.8	0.7695393	0	-0.001670353
1	688.5675	0.7723174	231	0.7723174	0	-0.001642619
1	688.0659	0.7723174	231.2	0.7723174	0	-0.001523433
1	688.0402	0.7723174	231.4	0.7723174	0	-0.001201424
1	687.6205	0.7723174	231.6	0.7723174	0	-0.00133361
1	687.0783	0.7750955	231.8	0.7750955	0	-0.001244686
1	687.7222	0.7750955	232	0.7750955	0	-0.001279021
1	688.4584	0.7750955	232.2	0.7750955	0	-0.001345392
1	688.9767	0.7750955	232.4	0.7750955	0	-0.001326553
1	688.9584	0.7778736	232.6	0.7778736	0	-0.001291548
1	688.0086	0.7778736	232.8	0.7778736	0	-0.001328803
1	683.1633	0.7778736	233	0.7778736	0	-0.001333693
1	671.9896	0.7778736	233.2	0.7778736	0	-0.001340721
1	651.8985	0.7806517	233.4	0.7806517	0	-0.00136182
1	639.8312	0.7806517	233.6	0.7806517	0	-0.00135393
1	640.0205	0.7806517	233.8	0.7806517	0	-0.001328721
1	628.1324	0.7806517	234	0.7806517	0	-0.001299012
1	626.4301	0.7806517	234.2	0.7806517	0	-0.001224424
1	627.4088	0.7834299	234.4	0.7834299	0	-0.001307818
1	627.0198	0.7834299	234.6	0.7834299	0	-0.001347326
1	626.4297	0.7834299	234.8	0.7834299	0	-0.00148721
1	626.6753	0.7834299	235	0.7834299	0	-0.00148477
1	626.8317	0.786208	235.2	0.786208	0	-0.001443612
1	626.8326	0.786208	235.4	0.786208	0	-0.00139217
1	627.5714	0.786208	235.6	0.786208	0	-0.001426535
1	628.541	0.786208	235.8	0.786208	0	-0.001335283
1	620.1365	0.7889861	236	0.7889861	0	-0.001397652
1	616.7158	0.7889861	236.2	0.7889861	0	-0.00133364
1	615.2154	0.7889861	236.4	0.7889861	0	-0.001191606
1	614.3495	0.7889861	236.6	0.7889861	0	-0.001276912
1	614.7255	0.7917643	236.8	0.7917643	0	-0.001150414
1	615.2045	0.7917643	237	0.7917643	0	-0.00114574
1	616.5445	0.7917643	237.2	0.7917643	0	-0.001197375
1	617.6113	0.7917643	237.4	0.7917643	0	-0.001398657
1	615.7806	0.7945424	237.6	0.7945424	0	-0.001299621
1	615.2111	0.7945424	237.8	0.7945424	0	-0.001412457
1	615.2346	0.7945424	238	0.7945424	0	-0.001417146
1	615.4658	0.7945424	238.2	0.7945424	0	-0.001301111
1	615.7665	0.7973205	238.4	0.7973205	0	-0.001348995
1	615.1385	0.7973205	238.6	0.7973205	0	-0.001400821
1	614.4608	0.7973205	238.8	0.7973205	0	-0.001402157
1	614.4753	0.7973205	239	0.7973205	0	-0.001427565
1	613.8125	0.7973205	239.2	0.7973205	0	-0.001463662
1	613.8311	0.8000986	239.4	0.8000986	0	-0.001535718
1	613.9779	0.8000986	239.6	0.8000986	0	-0.00159239
1	614.7825	0.8000986	239.8	0.8000986	0	-0.001514365
1	615.1949	0.8000986	240	0.8000986	0	-0.001508721
1	616.6022	0.8028767	240.2	0.8028767	0	-0.001481425
1	618.1882	0.8028767	240.4	0.8028767	0	-0.001535471
1	619.4222	0.8028767	240.6	0.8028767	0	-0.001692372
1	620.3227	0.8028767	240.8	0.8028767	0	-0.001497404
1	621.7462	0.8056548	241	0.8056548	0	-0.001327585
1	621.7852	0.8056548	241.2	0.8056548	0	-0.00147123
1	622.0056	0.8056548	241.4	0.8056548	0	-0.001341415
1	622.4623	0.8056548	241.6	0.8056548	0	-0.001321435
1	623.5569	0.8084329	241.8	0.8084329	0	-0.001323535
1	625.0444	0.8084329	242	0.8084329	0	-0.001264503
1	626.1288	0.8084329	242.2	0.8084329	0	-0.001338382
1	627.7108	0.8084329	242.4	0.8084329	0	-0.001341286
1	629.7573	0.811211	242.6	0.811211	0	-0.001341262
1	631.1901	0.811211	242.8	0.811211	0	-0.001330372
1	632.962	0.811211	243	0.811211	0	-0.001332931
1	634.7967	0.811211	243.2	0.811211	0	-0.001313373
1	636.132	0.8139892	243.4	0.8139892	0	-0.001306727
1	637.7096	0.8139892	243.6	0.8139892	0	-0.001220131
1	639.1354	0.8139892	243.8	0.8139892	0	-0.001312816
1	640.21	0.8139892	244	0.8139892	0	-0.001290808
1	640.8478	0.8139892	244.2	0.8139892	0	-0.001298387
1	641.0212	0.8167673	244.4	0.8167673	0	-0.001287344
1	642.0715	0.8167673	244.6	0.8167673	0	-0.001285019
1	642.6915	0.8167673	244.8	0.8167673	0	-0.001050348
1	642.7094	0.8167673	245	0.8167673	0	-0.001170539
1	625.8783	0.8195454	245.2	0.8195454	0	-0.001162601
1	608.0875	0.8195454	245.4	0.8195454	0	-0.001230777
1	608.4159	0.8195454	245.6	0.8195454	0	-0.001245361
1	609.3058	0.8195454	245.8	0.8195454	0	-0.001196877
1	606.3445	0.8223236	246	0.8223236	0	-0.000981481
1	605.8068	0.8223236	246.2	0.8223236	0	-0.001176685
1	604.9813	0.8223236	246.4	0.8223236	0	-0.001277997
1	604.5667	0.8223236	246.6	0.8223236	0	-0.001235945
1	605.3542	0.8251017	246.8	0.8251017	0	-0.001368393
1	605.0952	0.8251017	247	0.8251017	0	-0.0013555
1	605.3061	0.8251017	247.2	0.8251017	0	-0.001390356
1	604.7166	0.8251017	247.4	0.8251017	0	-0.001290774
1	603.7014	0.8278798	247.6	0.8278798	0	-0.001348339
1	603.0253	0.8278798	247.8	0.8278798	0	-0.001333248
1	602.1148	0.8278798	248	0.8278798	0	-0.001333572
1	601.1196	0.8278798	248.2	0.8278798	0	-0.001315405
1	599.3357	0.8306579	248.4	0.8306579	0	-0.00128767
1	598.0726	0.8306579	248.6	0.8306579	0	-0.001289977
1	598.3241	0.8306579	248.8	0.8306579	0	-0.001297338
1	597.4929	0.8306579	249	0.8306579	0	-0.001317298
1	596.9033	0.8306579	249.2	0.8306579	0	-0.001300304
1	597.7797	0.833436	249.4	0.833436	0	-0.001303619
1	598.1076	0.833436	249.6	0.833436	0	-0.00131548
1	599.0001	0.833436	249.8	0.833436	0	-0.001330167
1	599.5793	0.833436	250	0.833436	0	-0.001313187
1	600.264	0.8362141	250.2	0.8362141	0	-0.001271905
1	600.2373	0.8362141	250.4	0.8362141	0	-0.001258152
1	598.5551	0.8362141	250.6	0.8362141	0	-0.001254218
1	596.5925	0.8362141	250.8	0.8362141	0	-0.001256859
1	594.9506	0.8389923	251	0.8389923	0	-0.001256131
1	593.6077	0.8389923	251.2	0.8389923	0	-0.00122428
1	594.8255	0.8389923	251.4	0.8389923	0	-0.001214058
1	595.4204	0.8389923	251.6	0.8389923	0	-0.001248623
1	596.6783	0.8417704	251.8	0.8417704	0	-0.001286023
1	598.1987	0.8417704	252	0.8417704	0	-0.001269232
1	599.2143	0.8417704	252.2	0.8417704	0	-0.001242112
1	600.3718	0.8417704	252.4	0.8417704	0	-0.001218737
1	601.9305	0.8445485	252.6	0.8445485	0	-0.001093719
1	602.4591	0.8445485	252.8	0.8445485	0	-0.001093784
1	603.7791	0.8445485	253	0.8445485	0	-0.001192909
1	605.3903	0.8445485	253.2	0.8445485	0	-0.001139207
1	605.7636	0.8473266	253.4	0.8473266	0	-0.001121094
1	607.2813	0.8473266	253.6	0.8473266	0	-0.001109044
1	608.5433	0.8473266	253.8	0.8473266	0	-0.001092028
1	609.5825	0.8473266	254	0.8473266	0	-0.001066133
1	607.6232	0.8501047	254.2	0.8501047	0	-0.001107746
1	606.9997	0.8501047	254.4	0.8501047	0	-0.001107571
1	607.2623	0.8501047	254.6	0.8501047	0	-0.001081527
1	607.4299	0.8501047	254.8	0.8501047	0	-0.001104191
1	607.5684	0.8501047	255	0.8501047	0	-0.001112799
1	608.5062	0.8528829	255.2	0.8528829	0	-0.00112316
1	608.8087	0.8528829	255.4	0.8528829	0	-0.001152014
1	609.2319	0.8528829	255.6	0.8528829	0	-0.00116988
1	609.3135	0.8528829	255.8	0.8528829	0	-0.001177662
1	608.8641	0.855661	256	0.855661	0	-0.001182119
1	608.6434	0.855661	256.2	0.855661	0	-0.001196817
1	606.0492	0.855661	256.4	0.855661	0	-0.001310442
1	602.9722	0.855661	256.6	0.855661	0	-0.001212306
1	601.8931	0.8584391	256.8	0.8584391	0	-0.00106598
1	602.0016	0.8584391	257	0.8584391	0	-0.001220061
1	601.8619	0.8584391	257.2	0.8584391	0	-0.00109655
1	601.8882	0.8584391	257.4	0.8584391	0	-0.001183404
1	602.0639	0.8612173	257.6	0.8612173	0	-0.001206766
1	603.0065	0.8612173	257.8	0.8612173	0	-0.001200677
1	604.0844	0.8612173	258	0.8612173	0	-0.001160506
1	604.8186	0.8612173	258.2	0.8612173	0	-0.001205425
1	605.9424	0.8639954	258.4	0.8639954	0	-0.001222022
1	606.0231	0.8639954	258.6	0.8639954	0	-0.00120467
1	605.6901	0.8639954	258.8	0.8639954	0	-0.00126332
1	605.4533	0.8639954	259	0.8639954	0	-0.001296445
1	605.7709	0.8667735	259.2	0.8667735	0	-0.00129062
1	605.9263	0.8667735	259.4	0.8667735	0	-0.001390387
1	605.1989	0.8667735	259.6	0.8667735	0	-0.001351838
1	605.4617	0.8667735	259.8	0.8667735	0	-0.001364316
1	606.0443	0.8667735	260	0.8667735	0	-0.00138023
1	604.6405	0.8695516	260.2	0.8695516	0	-0.001434564
1	603.1279	0.8695516	260.4	0.8695516	0	-0.001433928
1	603.4969	0.8695516	260.6	0.8695516	0	-0.001430304
1	604.4006	0.8695516	260.8	0.8695516	0	-0.001454387
1	605.8073	0.8723297	261	0.8723297	0	-0.001482053
1	606.3912	0.8723297	261.2	0.8723297	0	-0.001452743
1	607.6898	0.8723297	261.4	0.8723297	0	-0.001147718
1	608.0674	0.8723297	261.6	0.8723297	0	-0.001009809
1	608.7974	0.8751078	261.8	0.8751078	0	-0.001161391
1	609.549	0.8751078	262	0.8751078	0	-0.001073565
1	610.1011	0.8751078	262.2	0.8751078	0	-0.001080425
1	610.8362	0.8751078	262.4	0.8751078	0	-0.001189225
1	611.5624	0.8778859	262.6	0.8778859	0	-0.001353292
1	612.733	0.8778859	262.8	0.8778859	0	-0.001251277
1	613.9859	0.8778859	263	0.8778859	0	-0.001272736
1	614.8066	0.8778859	263.2	0.8778859	0	-0.001192864
1	615.6877	0.8806641	263.4	0.8806641	0	-0.001173703
1	616.2628	0.8806641	263.6	0.8806641	0	-0.001235476
1	617.128	0.8806641	263.8	0.8806641	0	-0.001277156
1	618.0802	0.8806641	264	0.8806641	0	-0.001397903
1	618.4278	0.8834422	264.2	0.8834422	0	-0.001403386
1	618.3154	0.8834422	264.4	0.8834422	0	-0.001432621
1	618.2153	0.8834422	264.6	0.8834422	0	-0.001325044
1	618.233	0.8834422	264.8	0.8834422	0	-0.001344189
1	617.0181	0.8862203	265	0.8862203	0	-0.001370741
1	616.887	0.8862203	265.2	0.8862203	0	-0.00137631
1	617.113	0.8862203	265.4	0.8862203	0	-0.001357181
1	618.14	0.8862203	265.6	0.8862203	0	-0.001440672
1	619.3861	0.8862203	265.8	0.8862203	0	-0.001383508
1	620.3715	0.8889984	266	0.8889984	0	-0.001360414
1	621.1879	0.8889984	266.2	0.8889984	0	-0.001401325
1	622.3742	0.8889984	266.4	0.8889984	0	-0.001413957
1	623.0174	0.8889984	266.6	0.8889984	0	-0.00139603
1	623.995	0.8917766	266.8	0.8917766	0	-0.001398026
1	624.442	0.8917766	267	0.8917766	0	-0.001398656
1	625.5317	0.8917766	267.2	0.8917766	0	-0.001381539
1	626.3872	0.8917766	267.4	0.8917766	0	-0.001381095
1	626.4884	0.8945547	267.6	0.8945547	0	-0.001403192
1	625.7263	0.8945547	267.8	0.8945547	0	-0.001398211
1	623.9016	0.8945547	268	0.8945547	0	-0.001438276
1	620.3647	0.8945547	268.2	0.8945547	0	-0.001468738
1	619.7495	0.8973328	268.4	0.8973328	0	-0.00148247
1	619.7547	0.8973328	268.6	0.8973328	0	-0.001525909
1	618.8083	0.8973328	268.8	0.8973328	0	-0.00150284
1	618.7263	0.8973328	269	0.8973328	0	-0.001538662
1	618.3557	0.9001109	269.2	0.9001109	0	-0.001527456
1	617.8804	0.9001109	269.4	0.9001109	0	-0.001589363
1	618.4263	0.9001109	269.6	0.9001109	0	-0.001897559
1	619.4486	0.9001109	269.8	0.9001109	0	-0.001778981
1	620.8405	0.902889	270	0.902889	0	-0.001785901
1	622.0291	0.902889	270.2	0.902889	0	-0.001380578
1	623.7521	0.902889	270.4	0.902889	0	-0.001325232
1	625.1953	0.902889	270.6	0.902889	0	-0.001391917
1	626.5891	0.902889	270.8	0.902889	0	-0.001391604
1	627.7005	0.9056671	271	0.9056671	0	-0.001565208
1	627.7954	0.9056671	271.2	0.9056671	0	-0.001521052
1	627.0973	0.9056671	271.4	0.9056671	0	-0.001556005
1	626.5102	0.9056671	271.6	0.9056671	0	-0.001541438
1	626.541	0.9084453	271.8	0.9084453	0	-0.001479091
1	626.4308	0.9084453	272	0.9084453	0	-0.001514957
1	626.149	0.9084453	272.2	0.9084453	0	-0.001515587
1	626.7228	0.9084453	272.4	0.9084453	0	-0.001524127
1	626.7256	0.9112234	272.6	0.9112234	0	-0.001517057
1	627.5175	0.9112234	272.8	0.9112234	0	-0.001553312
1	628.8588	0.9112234	273	0.9112234	0	-0.001710945
1	629.6285	0.9112234	273.2	0.9112234	0	-0.001725257
1	630.351	0.9140015	273.4	0.9140015	0	-0.00173782
1	631.1523	0.9140015	273.6	0.9140015	0	-0.001656156
1	630.8674	0.9140015	273.8	0.9140015	0	-0.001661176
1	630.6689	0.9140015	274	0.9140015	0	-0.001700928
1	623.7097	0.9167796	274.2	0.9167796	0	-0.001684354
1	616.9313	0.9167796	274.4	0.9167796	0	-0.001640742
1	615.8282	0.9167796	274.6	0.9167796	0	-0.001605102
1	615.3049	0.9167796	274.8	0.9167796	0	-0.001618506
1	616.4787	0.9195578	275	0.9195578	0	-0.001639711
1	617.4048	0.9195578	275.2	0.9195578	0	-0.001613566
1	618.7927	0.9195578	275.4	0.9195578	0	-0.001489624
1	619.8425	0.9195578	275.6	0.9195578	0	-0.001586327
1	620.5959	0.9223359	275.8	0.9223359	0	-0.001605025
1	621.809	0.9223359	276	0.9223359	0	-0.001641128
1	622.0976	0.9223359	276.2	0.9223359	0	-0.001663345
1	622.7082	0.9223359	276.4	0.9223359	0	-0.001757121
1	623.4768	0.9223359	276.6	0.9223359	0	-0.001768639
1	624.0593	0.925114	276.8	0.925114	0	-0.001824943
1	625.5963	0.925114	277	0.925114	0	-0.001380628
1	626.1504	0.925114	277.2	0.925114	0	-0.001360426
1	626.6816	0.925114	277.4	0.925114	0	-0.001566597
1	627.8044	0.9278921	277.6	0.9278921	0	-0.001681639
1	628.5679	0.9278921	277.8	0.9278921	0	-0.001818567
1	628.8271	0.9278921	278	0.9278921	0	-0.001678321
1	629.7803	0.9278921	278.2	0.9278921	0	-0.001789633
1	628.8381	0.9306703	278.4	0.9306703	0	-0.001683817
1	625.8562	0.9306703	278.6	0.9306703	0	-0.001628535
1	623.6211	0.9306703	278.8	0.9306703	0	-0.001541441
1	620.4428	0.9306703	279	0.9306703	0	-0.001412228
1	616.535	0.9334484	279.2	0.9334484	0	-0.001430886
1	615.8871	0.9334484	279.4	0.9334484	0	-0.001380446
1	615.7864	0.9334484	279.6	0.9334484	0	-0.001475766
1	616.0227	0.9334484	279.8	0.9334484	0	-0.001444356
1	616.6988	0.9362265	280	0.9362265	0	-0.001445069
1	617.3592	0.9362265	280.2	0.9362265	0	-0.001452109
1	618.5049	0.9362265	280.4	0.9362265	0	-0.001731992
1	618.707	0.9362265	280.6	0.9362265	0	-0.001533879
1	611.178	0.9390046	280.8	0.9390046	0	-0.001605627
1	600.2208	0.9390046	281	0.9390046	0	-0.001567585
1	594.031	0.9390046	281.2	0.9390046	0	-0.001577711
1	594.8193	0.9390046	281.4	0.9390046	0	-0.001541487
1	595.0514	0.9390046	281.6	0.9390046	0	-0.001348851
1	594.7647	0.9417827	281.8	0.9417827	0	-0.001454314
1	595.1174	0.9417827	282	0.9417827	0	-0.001382945
1	595.1545	0.9417827	282.2	0.9417827	0	-0.001449744
1	595.4299	0.9417827	282.4	0.9417827	0	-0.001459832
1	597.1646	0.9445608	282.6	0.9445608	0	-0.00141154
1	598.1259	0.9445608	282.8	0.9445608	0	-0.001374423
1	598.8992	0.9445608	283	0.9445608	0	-0.00142696
1	597.0602	0.9445608	283.2	0.9445608	0	-0.001392677
1	593.0648	0.9473389	283.4	0.9473389	0	-0.001181235
1	592.2144	0.9473389	283.6	0.9473389	0	-0.001355613
1	592.5066	0.9473389	283.8	0.9473389	0	-0.001296966
1	593.7164	0.9473389	284	0.9473389	0	-0.001361858
1	594.4401	0.9501171	284.2	0.9501171	0	-0.001374075
1	595.4883	0.9501171	284.4	0.9501171	0	-0.001360772
1	596.6746	0.9501171	284.6	0.9501171	0	-0.0013193
1	598.2338	0.9501171	284.8	0.9501171	0	-0.001358624
1	599.8494	0.9528952	285	0.9528952	0	-0.001392139
1	600.8892	0.9528952	285.2	0.9528952	0	-0.001376717
1	602.4351	0.9528952	285.4	0.9528952	0	-0.001388188
1	603.5684	0.9528952	285.6	0.9528952	0	-0.001396155
1	604.7138	0.9556733	285.8	0.9556733	0	-0.001394558
1	605.6735	0.9556733	286	0.9556733	0	-0.001430859
1	606.2397	0.9556733	286.2	0.9556733	0	-0.001490156
1	606.4194	0.9556733	286.4	0.9556733	0	-0.001576547
1	607.3116	0.9556733	286.6	0.9556733	0	-0.001686719
1	608.5104	0.9584514	286.8	0.9584514	0	-0.00174341
1	609.866	0.9584514	287	0.9584514	0	-0.001690424
1	610.7844	0.9584514	287.2	0.9584514	0	-0.001621765
1	610.7813	0.9584514	287.4	0.9584514	0	-0.00168086
1	611.8196	0.9612296	287.6	0.9612296	0	-0.001681472
1	612.9814	0.9612296	287.8	0.9612296	0	-0.001678778
1	614.0959	0.9612296	288	0.9612296	0	-0.001669874
1	615.4346	0.9612296	288.2	0.9612296	0	-0.001613442
1	616.05	0.9640077	288.4	0.9640077	0	-0.001290114
1	615.6581	0.9640077	288.6	0.9640077	0	-0.001370091
1	615.9422	0.9640077	288.8	0.9640077	0	-0.001218258
1	609.5693	0.9640077	289	0.9640077	0	-0.001172515
1	607.4969	0.9667858	289.2	0.9667858	0	-0.001192651
1	604.6634	0.9667858	289.4	0.9667858	0	-0.001423696
1	603.8767	0.9667858	289.6	0.9667858	0	-0.001284644
1	585.9743	0.9667858	289.8	0.9667858	0	-0.001475215
1	569.563	0.9695639	290	0.9695639	0	-0.001523053
1	572.3218	0.9695639	290.2	0.9695639	0	-0.001489605
1	576.175	0.9695639	290.4	0.9695639	0	-0.00142133
1	577.6281	0.9695639	290.6	0.9695639	0	-0.001483028
1	579.637	0.972342	290.8	0.972342	0	-0.001510447
1	581.0865	0.972342	291	0.972342	0	-0.00149242
1	582.6534	0.972342	291.2	0.972342	0	-0.001518521
1	584.8179	0.972342	291.4	0.972342	0	-0.001518796
1	587.0302	0.972342	291.6	0.972342	0	-0.001550411
1	589.112	0.9751202	291.8	0.9751202	0	-0.001657444
1	591.2941	0.9751202	292	0.9751202	0	-0.001571473
1	592.9503	0.9751202	292.2	0.9751202	0	-0.001552935
1	593.9295	0.9751202	292.4	0.9751202	0	-0.001578391
1	595.1118	0.9778983	292.6	0.9778983	0	-0.001594377
1	595.54	0.9778983	292.8	0.9778983	0	-0.001568963
1	596.8358	0.9778983	293	0.9778983	0	-0.001536577
1	597.5768	0.9778983	293.2	0.9778983	0	-0.00148811
1	598.7731	0.9806764	293.4	0.9806764	0	-0.001492194
1	600.1351	0.9806764	293.6	0.9806764	0	-0.001486486
1	601.676	0.9806764	293.8	0.9806764	0	-0.001464078
1	603.17	0.9806764	294	0.9806764	0	-0.001434118
1	604.6912	0.9834545	294.2	0.9834545	0	-0.001395872
1	606.2111	0.9834545	294.4	0.9834545	0	-0.001424167
1	607.1531	0.9834545	294.6	0.9834545	0	-0.001448783
1	607.8836	0.9834545	294.8	0.9834545	0	-0.001439499
1	609.0054	0.9862326	295	0.9862326	0	-0.001283272
1	609.8871	0.9862326	295.2	0.9862326	0	-0.001384096
1	610.6304	0.9862326	295.4	0.9862326	0	-0.00126694
1	612.3889	0.9862326	295.6	0.9862326	0	-0.001386363
1	613.6144	0.9890108	295.8	0.9890108	0	-0.00139982
1	595.0455	0.9890108	296	0.9890108	0	-0.001356832
1	584.752	0.9890108	296.2	0.9890108	0	-0.001437777
1	585.5021	0.9890108	296.4	0.9890108	0	-0.001386339
1	586.9114	0.9917889	296.6	0.9917889	0	-0.001515307
1	588.3384	0.9917889	296.8	0.9917889	0	-0.0015443
1	589.1512	0.9917889	297	0.9917889	0	-0.001476924
1	590.4469	0.9917889	297.2	0.9917889	0	-0.001482116
1	591.193	0.9917889	297.4	0.9917889	0	-0.001497591
1	592.0333	0.994567	297.6	0.994567	0	-0.001521237
1	593.2554	0.994567	297.8	0.994567	0	-0.001494917
1	594.461	0.994567	298	0.994567	0	-0.001378947
1	595.418	0.994567	298.2	0.994567	0	-0.001429985
1	595.6828	0.9973451	298.4	0.9973451	0	-0.00143879
1	595.9969	0.9973451	298.6	0.9973451	0	-0.001431023
1	596.7258	0.9973451	298.8	0.9973451	0	-0.001398992
1	597.2557	0.9973451	299	0.9973451	0	-0.001399964
1	598.4028	1.000123	299.2	1.000123	0	-0.001425455
1	599.7227	1.000123	299.4	1.000123	0	-0.001544891
1	599.8742	1.000123	299.6	1.000123	0	-0.001567649
1	601.2249	1.000123	299.8	1.000123	0	-0.00148946
1	599.2088	1.002901	300	1.002901	0	-0.001484148
1	597.4557	1.002901	300.2	1.002901	0	-0.001481331
1	598.5157	1.002901	300.4	1.002901	0	-0.001511899
1	599.101	1.002901	300.6	1.002901	0	-0.001534022
1	600.0969	1.005679	300.8	1.005679	0	-0.001508841
1	601.3717	1.005679	301	1.005679	0	-0.001482641
1	602.7339	1.005679	301.2	1.005679	0	-0.001481795
1	603.9348	1.005679	301.4	1.005679	0	-0.001512256
1	604.5552	1.005679	301.6	1.005679	0	-0.001527655
1	605.4824	1.008458	301.8	1.008458	0	-0.001539497
1	606.6777	1.008458	302	1.008458	0	-0.001526159
1	606.8299	1.008458	302.2	1.008458	0	-0.001498133
1	607.7382	1.008458	302.4	1.008458	0	-0.001493188
1	608.7506	1.011236	302.6	1.011236	0	-0.001496524
1	609.3129	1.011236	302.8	1.011236	0	-0.001490472
1	610.4438	1.011236	303	1.011236	0	-0.001460801
1	611.8917	1.011236	303.2	1.011236	0	-0.001461323
1	613.2	1.014014	303.4	1.014014	0	-0.001463672
1	614.6523	1.014014	303.6	1.014014	0	-0.001457422
1	615.5433	1.014014	303.8	1.014014	0	-0.001438009
1	616.4825	1.014014	304	1.014014	0	-0.00144572
1	616.7849	1.016792	304.2	1.016792	0	-0.001471768
1	617.3378	1.016792	304.4	1.016792	0	-0.001796273
1	617.9341	1.016792	304.6	1.016792	0	-0.001675548
1	617.2309	1.016792	304.8	1.016792	0	-0.001709916
1	617.2668	1.01957	305	1.01957	0	-0.001655541
1	618.1062	1.01957	305.2	1.01957	0	-0.001602043
1	618.9795	1.01957	305.4	1.01957	0	-0.001646099
1	612.2574	1.01957	305.6	1.01957	0	-0.001672838
1	608.4266	1.022348	305.8	1.022348	0	-0.001675523
1	607.7821	1.022348	306	1.022348	0	-0.0016662
1	608.1634	1.022348	306.2	1.022348	0	-0.00167763
1	609.0647	1.022348	306.4	1.022348	0	-0.001695026
1	610.8373	1.025126	306.6	1.025126	0	-0.001700691
1	612.1731	1.025126	306.8	1.025126	0	-0.001668251
1	613.4413	1.025126	307	1.025126	0	-0.001580513
1	614.5735	1.025126	307.2	1.025126	0	-0.001508314
1	615.0216	1.025126	307.4	1.025126	0	-0.001507005
1	615.3169	1.027904	307.6	1.027904	0	-0.00157542
1	615.7327	1.027904	307.8	1.027904	0	-0.001556369
1	615.9409	1.027904	308	1.027904	0	-0.00152213
1	616.1817	1.027904	308.2	1.027904	0	-0.001494624
1	615.6096	1.030683	308.4	1.030683	0	-0.001229415
1	615.5071	1.030683	308.6	1.030683	0	-0.001331448
1	616.5156	1.030683	308.8	1.030683	0	-0.001364407
1	617.642	1.030683	309	1.030683	0	-0.001431266
1	618.7977	1.033461	309.2	1.033461	0	-0.001568813
1	619.5811	1.033461	309.4	1.033461	0	-0.001639882
1	619.7004	1.033461	309.6	1.033461	0	-0.001641154
1	620.4177	1.033461	309.8	1.033461	0	-0.001706273
1	621.3649	1.036239	310	1.036239	0	-0.001609801
1	622.072	1.036239	310.2	1.036239	0	-0.001641531
1	623.0723	1.036239	310.4	1.036239	0	-0.0016542
1	623.7089	1.036239	310.6	1.036239	0	-0.001670821
1	623.6924	1.039017	310.8	1.039017	0	-0.001650563
1	619.7961	1.039017	311	1.039017	0	-0.00167096
1	618.5273	1.039017	311.2	1.039017	0	-0.001680914
1	618.5082	1.039017	311.4	1.039017	0	-0.001659828
1	619.0469	1.041795	311.6	1.041795	0	-0.001684918
1	619.7516	1.041795	311.8	1.041795	0	-0.001680066
1	620.6581	1.041795	312	1.041795	0	-0.001660224
1	621.5869	1.041795	312.2	1.041795	0	-0.00165879
1	622.4073	1.041795	312.4	1.041795	0	-0.001651175
1	623.3956	1.044573	312.6	1.044573	0	-0.001615569
1	624.3468	1.044573	312.8	1.044573	0	-0.0016379
1	624.9402	1.044573	313	1.044573	0	-0.001663868
1	625.6546	1.044573	313.2	1.044573	0	-0.001644703
1	626.5522	1.047351	313.4	1.047351	0	-0.001744129
1	627.1923	1.047351	313.6	1.047351	0	-0.001659924
1	627.8969	1.047351	313.8	1.047351	0	-0.001667654
1	628.2626	1.047351	314	1.047351	0	-0.001681988
1	628.3751	1.050129	314.2	1.050129	0	-0.001697213
1	628.2819	1.050129	314.4	1.050129	0	-0.001652519
1	628.9242	1.050129	314.6	1.050129	0	-0.001623216
1	629.0587	1.050129	314.8	1.050129	0	-0.001595788
1	629.7289	1.052907	315	1.052907	0	-0.001603134
1	629.7202	1.052907	315.2	1.052907	0	-0.001581751
1	628.6459	1.052907	315.4	1.052907	0	-0.001580756
1	627.911	1.052907	315.6	1.052907	0	-0.001542598
1	623.1727	1.055686	315.8	1.055686	0	-0.001525121
1	621.468	1.055686	316	1.055686	0	-0.001483604
1	621.827	1.055686	316.2	1.055686	0	-0.001393131
1	620.96	1.055686	316.4	1.055686	0	-0.001331587
1	618.6796	1.058464	316.6	1.058464	0	-0.001431909
1	616.3459	1.058464	316.8	1.058464	0	-0.001416619
1	616.6807	1.058464	317	1.058464	0	-0.001426246
1	615.8245	1.058464	317.2	1.058464	0	-0.001505181
1	614.5225	1.061242	317.4	1.061242	0	-0.0014038
1	614.133	1.061242	317.6	1.061242	0	-0.001440669
1	614.6086	1.061242	317.8	1.061242	0	-0.001451581
1	615.2969	1.061242	318	1.061242	0	-0.00150313
1	616.5883	1.061242	318.2	1.061242	0	-0.001491743
1	617.8038	1.06402	318.4	1.06402	0	-0.001634553
1	619.3278	1.06402	318.6	1.06402	0	-0.001619957
1	621.164	1.06402	318.8	1.06402	0	-0.001404215
1	622.4711	1.06402	319	1.06402	0	-0.001565397
1	623.9549	1.066798	319.2	1.066798	0	-0.001484581
1	625.0903	1.066798	319.4	1.066798	0	-0.001563082
1	626.9988	1.066798	319.6	1.066798	0	-0.001533452
1	628.5179	1.066798	319.8	1.066798	0	-0.001518899
1	629.7407	1.069576	320	1.069576	0	-0.001431373
1	631.0555	1.069576	320.2	1.069576	0	-0.001438588
1	631.5889	1.069576	320.4	1.069576	0	-0.001351805
1	632.0159	1.069576	320.6	1.069576	0	-0.001444591
1	632.8972	1.072354	320.8	1.072354	0	-0.001781137
1	632.9142	1.072354	321	1.072354	0	-0.001610467
1	633.2786	1.072354	321.2	1.072354	0	-0.001659915
1	633.8589	1.072354	321.4	1.072354	0	-0.001590962
1	633.8346	1.075132	321.6	1.075132	0	-0.001564628
1	634.2936	1.075132	321.8	1.075132	0	-0.001557131
1	635.151	1.075132	322	1.075132	0	-0.001471836
1	635.5693	1.075132	322.2	1.075132	0	-0.001381111
1	634.9351	1.077911	322.4	1.077911	0	-0.001303253
1	633.8862	1.077911	322.6	1.077911	0	-0.001276894
1	634.0271	1.077911	322.8	1.077911	0	-0.001248307
1	634.6685	1.077911	323	1.077911	0	-0.001314372
1	635.3661	1.080689	323.2	1.080689	0	-0.001233223
1	635.4905	1.080689	323.4	1.080689	0	-0.001214981
1	635.8771	1.080689	323.6	1.080689	0	-0.001082722
1	636.5908	1.080689	323.8	1.080689	0	-0.001099846
1	637.1307	1.080689	324	1.080689	0	-0.001173011
1	636.9065	1.083467	324.2	1.083467	0	-0.001165862
1	637.4966	1.083467	324.4	1.083467	0	-0.001321068
1	638.4614	1.083467	324.6	1.083467	0	-0.001368678
1	639.0671	1.083467	324.8	1.083467	0	-0.001396695
1	639.5031	1.086245	325	1.086245	0	-0.001484875
1	640.1423	1.086245	325.2	1.086245	0	-0.001392926
1	639.6779	1.086245	325.4	1.086245	0	-0.001426276
1	640.1439	1.086245	325.6	1.086245	0	-0.001457616
1	639.9929	1.089023	325.8	1.089023	0	-0.001488098
1	639.8982	1.089023	326	1.089023	0	-0.001495358
1	640.7788	1.089023	326.2	1.089023	0	-0.001508473
1	638.3032	1.089023	326.4	1.089023	0	-0.001513511
1	614.5382	1.091801	326.6	1.091801	0	-0.001478063
1	604.4299	1.091801	326.8	1.091801	0	-0.001465575
1	605.1265	1.091801	327	1.091801	0	-0.001486241
1	606.0614	1.091801	327.2	1.091801	0	-0.001494618
1	607.2056	1.094579	327.4	1.094579	0	-0.001466672
1	607.6644	1.094579	327.6	1.094579	0	-0.001256693
1	608.0809	1.094579	327.8	1.094579	0	-0.001392087
1	606.3168	1.094579	328	1.094579	0	-0.001305185
1	603.4482	1.094579	328.2	1.094579	0	-0.001429289
1	602.4428	1.097357	328.4	1.097357	0	-0.00140159
1	601.9124	1.097357	328.6	1.097357	0	-0.00109124
1	599.2885	1.097357	328.8	1.097357	0	-0.001300458
1	594.7466	1.097357	329	1.097357	0	-0.001224125
1	593.908	1.100136	329.2	1.100136	0	-0.001320519
1	594.1868	1.100136	329.4	1.100136	0	-0.001316747
1	594.0942	1.100136	329.6	1.100136	0	-0.001324101
1	592.403	1.100136	329.8	1.100136	0	-0.001281872
1	590.8602	1.102914	330	1.102914	0	-0.001313831
1	590.533	1.102914	330.2	1.102914	0	-0.001351804
1	591.231	1.102914	330.4	1.102914	0	-0.001344894
1	592.4081	1.102914	330.6	1.102914	0	-0.001326136
1	593.6363	1.105692	330.8	1.105692	0	-0.001295938
1	594.6918	1.105692	331	1.105692	0	-0.001177765
1	595.9597	1.105692	331.2	1.105692	0	-0.001136638
1	597.002	1.105692	331.4	1.105692	0	-0.001151331
1	597.6282	1.10847	331.6	1.10847	0	-0.001213981
1	599.3901	1.10847	331.8	1.10847	0	-0.001241731
1	600.6032	1.10847	332	1.10847	0	-0.001335835
1	601.0451	1.10847	332.2	1.10847	0	-0.001416491
1	602.2362	1.111248	332.4	1.111248	0	-0.001479895
1	602.7628	1.111248	332.6	1.111248	0	-0.001506604
1	603.737	1.111248	332.8	1.111248	0	-0.001569762
1	605.1293	1.111248	333	1.111248	0	-0.001617842
1	605.9856	1.114026	333.2	1.114026	0	-0.00167126
1	606.9346	1.114026	333.4	1.114026	0	-0.001650932
1	607.0929	1.114026	333.6	1.114026	0	-0.001629842
1	607.322	1.114026	333.8	1.114026	0	-0.001614808
1	608.1705	1.114026	334	1.114026	0	-0.001654534
1	600.2838	1.116804	334.2	1.116804	0	-0.001649813
1	589.7413	1.116804	334.4	1.116804	0	-0.001646854
1	590.1039	1.116804	334.6	1.116804	0	-0.001627398
1	590.5673	1.116804	334.8	1.116804	0	-0.001595022
1	591.4229	1.119582	335	1.119582	0	-0.001608082
1	592.5657	1.119582	335.2	1.119582	0	-0.001589325
1	593.7224	1.119582	335.4	1.119582	0	-0.001603539
1	594.0964	1.119582	335.6	1.119582	0	-0.00156627
1	594.2997	1.12236	335.8	1.12236	0	-0.001573667
1	594.7014	1.12236	336	1.12236	0	-0.001589952
1	594.9767	1.12236	336.2	1.12236	0	-0.001600795
1	595.6351	1.12236	336.4	1.12236	0	-0.001594087
1	596.1953	1.125139	336.6	1.125139	0	-0.001559494
1	596.0301	1.125139	336.8	1.125139	0	-0.001551449
1	592.9979	1.125139	337	1.125139	0	-0.001442651
1	589.4337	1.125139	337.2	1.125139	0	-0.001395471
1	588.1674	1.127917	337.4	1.127917	0	-0.001486858
1	588.7401	1.127917	337.6	1.127917	0	-0.001468502
1	589.4966	1.127917	337.8	1.127917	0	-0.001436599
1	590.7095	1.127917	338	1.127917	0	-0.001463821
1	590.9381	1.130695	338.2	1.130695	0	-0.001472965
1	587.9214	1.130695	338.4	1.130695	0	-0.001468495
1	576.1315	1.130695	338.6	1.130695	0	-0.001491595
1	573.5953	1.130695	338.8	1.130695	0	-0.001502672
1	570.6452	1.130695	339	1.130695	0	-0.00148089
1	569.078	1.133473	339.2	1.133473	0	-0.001503322
1	568.009	1.133473	339.4	1.133473	0	-0.001511175
1	568.8154	1.133473	339.6	1.133473	0	-0.001492865
1	569.6924	1.133473	339.8	1.133473	0	-0.001481261
1	570.9429	1.136251	340	1.136251	0	-0.001475523
1	572.1716	1.136251	340.2	1.136251	0	-0.001472036
1	572.8572	1.136251	340.4	1.136251	0	-0.001495784
1	573.5929	1.136251	340.6	1.136251	0	-0.00147785
1	573.9106	1.139029	340.8	1.139029	0	-0.001459492
1	574.894	1.139029	341	1.139029	0	-0.001431898
1	575.8426	1.139029	341.2	1.139029	0	-0.001321344
1	575.8531	1.139029	341.4	1.139029	0	-0.001414691
1	575.6573	1.141807	341.6	1.141807	0	-0.001418338
1	576.4933	1.141807	341.8	1.141807	0	-0.001390486
1	576.6829	1.141807	342	1.141807	0	-0.001391992
1	577.422	1.141807	342.2	1.141807	0	-0.001436391
1	577.4417	1.144585	342.4	1.144585	0	-0.001427945
1	576.616	1.144585	342.6	1.144585	0	-0.001427324
1	577.1752	1.144585	342.8	1.144585	0	-0.001457457
1	577.8362	1.144585	343	1.144585	0	-0.001473476
1	577.8223	1.147364	343.2	1.147364	0	-0.001500381
1	578.0225	1.147364	343.4	1.147364	0	-0.001530557
1	578.2552	1.147364	343.6	1.147364	0	-0.001598183
1	579.0483	1.147364	343.8	1.147364	0	-0.001623408
1	579.915	1.147364	344	1.147364	0	-0.001666561
1	581.2628	1.150142	344.2	1.150142	0	-0.001632016
1	582.5518	1.150142	344.4	1.150142	0	-0.001482961
1	583.1171	1.150142	344.6	1.150142	0	-0.0014089
1	583.7867	1.150142	344.8	1.150142	0	-0.001502938
1	584.8137	1.15292	345	1.15292	0	-0.001502845
1	584.6763	1.15292	345.2	1.15292	0	-0.001587848
1	583.3043	1.15292	345.4	1.15292	0	-0.00159084
1	583.8927	1.15292	345.6	1.15292	0	-0.001568866
1	584.6077	1.155698	345.8	1.155698	0	-0.001651489
1	585.2552	1.155698	346	1.155698	0	-0.001608767
1	585.2567	1.155698	346.2	1.155698	0	-0.001651229
1	585.1564	1.155698	346.4	1.155698	0	-0.001631651
1	584.3751	1.158476	346.6	1.158476	0	-0.001624461
1	584.0054	1.158476	346.8	1.158476	0	-0.001652242
1	583.4086	1.158476	347	1.158476	0	-0.001646315
1	581.7051	1.158476	347.2	1.158476	0	-0.00164495
1	579.9246	1.161254	347.4	1.161254	0	-0.001639179
1	579.9522	1.161254	347.6	1.161254	0	-0.001659938
1	580.601	1.161254	347.8	1.161254	0	-0.001654487
1	581.7996	1.161254	348	1.161254	0	-0.00170159
1	582.8866	1.164032	348.2	1.164032	0	-0.001740166
1	584.1526	1.164032	348.4	1.164032	0	-0.001731289
1	586.1274	1.164032	348.6	1.164032	0	-0.001753078
1	587.8586	1.164032	348.8	1.164032	0	-0.001763616
1	589.354	1.164032	349	1.164032	0	-0.001766107
1	591.0557	1.16681	349.2	1.16681	0	-0.00173386
1	592.372	1.16681	349.4	1.16681	0	-0.001560965
1	593.702	1.16681	349.6	1.16681	0	-0.001522157
1	594.1472	1.16681	349.8	1.16681	0	-0.001471602
1	595.2289	1.169589	350	1.169589	0	-0.001489358
1	596.0266	1.169589	350.2	1.169589	0	-0.00152787
1	596.1212	1.169589	350.4	1.169589	0	-0.001481555
1	596.2208	1.169589	350.6	1.169589	0	-0.001474033
1	591.6548	1.172367	350.8	1.172367	0	-0.00147617
1	579.765	1.172367	351	1.172367	0	-0.001462145
1	574.7687	1.172367	351.2	1.172367	0	-0.00146367
1	573.8508	1.172367	351.4	1.172367	0	-0.001469832
1	574.3961	1.175145	351.6	1.175145	0	-0.001468644
1	575.1812	1.175145	351.8	1.175145	0	-0.0014844
1	575.3788	1.175145	352	1.175145	0	-0.001503533
1	576.2186	1.175145	352.2	1.175145	0	-0.00150072
1	577.5364	1.177923	352.4	1.177923	0	-0.001503022
1	578.3416	1.177923	352.6	1.177923	0	-0.00152446
1	579.8369	1.177923	352.8	1.177923	0	-0.001545395
1	581.3837	1.177923	353	1.177923	0	-0.001551567
1	582.5589	1.180701	353.2	1.180701	0	-0.001504879
1	584.5396	1.180701	353.4	1.180701	0	-0.001306646
1	585.8338	1.180701	353.6	1.180701	0	-0.001502457
1	586.7829	1.180701	353.8	1.180701	0	-0.001336874
1	587.6029	1.183479	354	1.183479	0	-0.001169625
1	587.5082	1.183479	354.2	1.183479	0	-0.001331936
1	587.8147	1.183479	354.4	1.183479	0	-0.00127099
1	587.8127	1.183479	354.6	1.183479	0	-0.00135743
1	587.9008	1.186257	354.8	1.186257	0	-0.00138217
1	587.1843	1.186257	355	1.186257	0	-0.001517037
1	587.1573	1.186257	355.2	1.186257	0	-0.001515073
1	587.2987	1.186257	355.4	1.186257	0	-0.001439851
1	586.4927	1.186257	355.6	1.186257	0	-0.001490484
1	585.9163	1.189035	355.8	1.189035	0	-0.001494914
1	585.7849	1.189035	356	1.189035	0	-0.00152564
1	585.5865	1.189035	356.2	1.189035	0	-0.001531805
1	585.1108	1.189035	356.4	1.189035	0	-0.001583757
1	585.2518	1.191813	356.6	1.191813	0	-0.001635962
1	585.1118	1.191813	356.8	1.191813	0	-0.001572135
1	583.3288	1.191813	357	1.191813	0	-0.001581945
1	582.4133	1.191813	357.2	1.191813	0	-0.001590488
1	582.0893	1.194592	357.4	1.194592	0	-0.00158901
1	580.8377	1.194592	357.6	1.194592	0	-0.001592342
1	579.7254	1.194592	357.8	1.194592	0	-0.001578717
1	579.0247	1.194592	358	1.194592	0	-0.001544132
1	578.71	1.19737	358.2	1.19737	0	-0.001545988
1	579.0718	1.19737	358.4	1.19737	0	-0.001564757
1	579.648	1.19737	358.6	1.19737	0	-0.001532396
1	579.8517	1.19737	358.8	1.19737	0	-0.001480211
1	579.5527	1.200148	359	1.200148	0	-0.00136925
1	580.3991	1.200148	359.2	1.200148	0	-0.001249149
1	581.1767	1.200148	359.4	1.200148	0	-0.001200341
1	581.8734	1.200148	359.6	1.200148	0	-0.001260224
1	582.7036	1.200148	359.8	1.200148	0	-0.001298955
1	583.5319	1.202926	360	1.202926	0	-0.00126716
1	584.1227	1.202926	360.2	1.202926	0	-0.001255195
1	585.0627	1.202926	360.4	1.202926	0	-0.001304485
1	586.4836	1.202926	360.6	1.202926	0	-0.00161579
1	587.8643	1.205704	360.8	1.205704	0	-0.001526904
1	588.6428	1.205704	361	1.205704	0	-0.001619922
1	588.9236	1.205704	361.2	1.205704	0	-0.001639242
1	588.8872	1.205704	361.4	1.205704	0	-0.001528972
1	586.6369	1.208482	361.6	1.208482	0	-0.001594948
1	582.8857	1.208482	361.8	1.208482	0	-0.001638733
1	577.9333	1.208482	362	1.208482	0	-0.001640386
1	573.7326	1.208482	362.2	1.208482	0	-0.001659605
1	554.3547	1.21126	362.4	1.21126	0	-0.001656275
1	552.4029	1.21126	362.6	1.21126	0	-0.001637386
1	551.0034	1.21126	362.8	1.21126	0	-0.001597469
1	549.704	1.21126	363	1.21126	0	-0.001459765
1	549.6998	1.214038	363.2	1.214038	0	-0.001467858
1	550.3281	1.214038	363.4	1.214038	0	-0.001571342
1	551.1338	1.214038	363.6	1.214038	0	-0.001569004
1	552.3156	1.214038	363.8	1.214038	0	-0.00160965
1	553.903	1.216817	364	1.216817	0	-0.001615749
1	549.5728	1.216817	364.2	1.216817	0	-0.001573745
1	531.0244	1.216817	364.4	1.216817	0	-0.001640586
1	531.345	1.216817	364.6	1.216817	0	-0.001764755
1	532.431	1.219595	364.8	1.219595	0	-0.001781261
1	533.0907	1.219595	365	1.219595	0	-0.001673476
1	532.9703	1.219595	365.2	1.219595	0	-0.00168437
1	533.0795	1.219595	365.4	1.219595	0	-0.001730277
1	533.1942	1.219595	365.6	1.219595	0	-0.001624165
1	533.0752	1.222373	365.8	1.222373	0	-0.001418929
1	532.988	1.222373	366	1.222373	0	-0.001619821
1	533.9437	1.222373	366.2	1.222373	0	-0.001489168
1	534.6445	1.222373	366.4	1.222373	0	-0.001618843
1	535.0353	1.225151	366.6	1.225151	0	-0.001632766
1	534.9139	1.225151	366.8	1.225151	0	-0.001627471
1	534.6229	1.225151	367	1.225151	0	-0.001721854
1	534.3928	1.225151	367.2	1.225151	0	-0.001628937
1	534.6165	1.227929	367.4	1.227929	0	-0.001662649
1	535.7906	1.227929	367.6	1.227929	0	-0.001652522
1	535.8179	1.227929	367.8	1.227929	0	-0.001561239
1	536.3663	1.227929	368	1.227929	0	-0.00146948
1	536.5934	1.230707	368.2	1.230707	0	-0.001414871
1	537.2188	1.230707	368.4	1.230707	0	-0.001419587
1	538.1112	1.230707	368.6	1.230707	0	-0.001357723
1	539.2079	1.230707	368.8	1.230707	0	-0.001431099
1	540.4508	1.233485	369	1.233485	0	-0.001397395
1	541.5474	1.233485	369.2	1.233485	0	-0.001394027
1	542.983	1.233485	369.4	1.233485	0	-0.001378761
1	544.5497	1.233485	369.6	1.233485	0	-0.00139994
1	545.2425	1.236263	369.8	1.236263	0	-0.001372253
1	545.4565	1.236263	370	1.236263	0	-0.001372242
1	545.7722	1.236263	370.2	1.236263	0	-0.001404738
1	545.798	1.236263	370.4	1.236263	0	-0.001432895
1	547.0077	1.236263	370.6	1.236263	0	-0.001555438
1	548.1077	1.239042	370.8	1.239042	0	-0.001541043
1	549.0253	1.239042	371	1.239042	0	-0.001558129
1	550.2865	1.239042	371.2	1.239042	0	-0.00148636
1	550.8234	1.239042	371.4	1.239042	0	-0.0015111
1	551.9717	1.24182	371.6	1.24182	0	-0.001521855
1	553.1417	1.24182	371.8	1.24182	0	-0.001539054
1	553.1522	1.24182	372	1.24182	0	-0.001528754
1	553.3569	1.24182	372.2	1.24182	0	-0.001495761
1	553.2708	1.244598	372.4	1.244598	0	-0.001505411
1	551.6759	1.244598	372.6	1.244598	0	-0.001505272
1	544.9174	1.244598	372.8	1.244598	0	-0.001534304
1	533.0793	1.244598	373	1.244598	0	-0.001574028
1	525.36	1.247376	373.2	1.247376	0	-0.001681981
1	524.7469	1.247376	373.4	1.247376	0	-0.001764729
1	524.3848	1.247376	373.6	1.247376	0	-0.001861423
1	524.1909	1.247376	373.8	1.247376	0	-0.001930735
1	523.2584	1.250154	374	1.250154	0	-0.001947408
1	522.6456	1.250154	374.2	1.250154	0	-0.001678436
1	523.835	1.250154	374.4	1.250154	0	-0.001839331
1	524.5433	1.250154	374.6	1.250154	0	-0.001750295
1	525.3969	1.252932	374.8	1.252932	0	-0.001712768
1	525.8788	1.252932	375	1.252932	0	-0.001842889
1	526.1021	1.252932	375.2	1.252932	0	-0.001776781
1	525.5163	1.252932	375.4	1.252932	0	-0.001718215
1	525.498	1.25571	375.6	1.25571	0	-0.001691822
1	525.3889	1.25571	375.8	1.25571	0	-0.001581699
1	525.5673	1.25571	376	1.25571	0	-0.001671396
1	525.8782	1.25571	376.2	1.25571	0	-0.001632273
1	526.3365	1.25571	376.4	1.25571	0	-0.001669309
1	525.2277	1.258488	376.6	1.258488	0	-0.001608985
1	524.2167	1.258488	376.8	1.258488	0	-0.00159979
1	523.6343	1.258488	377	1.258488	0	-0.001596162
1	522.9711	1.258488	377.2	1.258488	0	-0.001610416
1	520.8558	1.261266	377.4	1.261266	0	-0.00162144
1	518.4265	1.261266	377.6	1.261266	0	-0.001606366
1	510.4571	1.261266	377.8	1.261266	0	-0.001628607
1	501.6924	1.261266	378	1.261266	0	-0.001588386
1	499.9165	1.264045	378.2	1.264045	0	-0.001626721
1	498.5535	1.264045	378.4	1.264045	0	-0.001666696
1	498.1168	1.264045	378.6	1.264045	0	-0.001698542
1	497.2258	1.264045	378.8	1.264045	0	-0.001668971
1	495.4723	1.266823	379	1.266823	0	-0.001474598
1	482.964	1.266823	379.2	1.266823	0	-0.001669804
1	440.413	1.266823	379.4	1.266823	0	-0.001538338
1	437.6624	1.266823	379.6	1.266823	0	-0.001558914
1	439.867	1.269601	379.8	1.269601	0	-0.001635503
1	443.732	1.269601	380	1.269601	0	-0.001626953
1	446.1949	1.269601	380.2	1.269601	0	-0.001707417
1	446.7368	1.269601	380.4	1.269601	0	-0.001733112
1	448.0188	1.272379	380.6	1.272379	0	-0.001669184
1	447.9127	1.272379	380.8	1.272379	0	-0.001642956
1	448.3223	1.272379	381	1.272379	0	-0.00165614
1	449.5843	1.272379	381.2	1.272379	0	-0.00167105
1	450.1391	1.272379	381.4	1.272379	0	-0.001628468
1	450.6761	1.275157	381.6	1.275157	0	-0.001594135
1	451.0405	1.275157	381.8	1.275157	0	-0.001546584
1	451.4717	1.275157	382	1.275157	0	-0.001404481
1	451.8901	1.275157	382.2	1.275157	0	-0.00141286
1	452.8568	1.277935	382.4	1.277935	0	-0.00147179
1	453.544	1.277935	382.6	1.277935	0	-0.001416909
1	454.3177	1.277935	382.8	1.277935	0	-0.001091713
1	453.6236	1.277935	383	1.277935	0	-0.001357985
1	450.8801	1.280713	383.2	1.280713	0	-0.001441731
1	447.6089	1.280713	383.4	1.280713	0	-0.001326338
1	446.95	1.280713	383.6	1.280713	0	-0.001319288
1	447.7146	1.280713	383.8	1.280713	0	-0.001273474
1	448.3186	1.283491	384	1.283491	0	-0.001287219
1	449.3269	1.283491	384.2	1.283491	0	-0.001302513
1	450.4362	1.283491	384.4	1.283491	0	-0.001313627
1	450.9414	1.283491	384.6	1.283491	0	-0.001256767
1	451.6636	1.28627	384.8	1.28627	0	-0.001242779
1	450.9214	1.28627	385	1.28627	0	-0.001239234
1	448.7421	1.28627	385.2	1.28627	0	-0.001250168
1	448.0627	1.28627	385.4	1.28627	0	-0.001279749
1	447.8785	1.289048	385.6	1.289048	0	-0.001220765
1	447.7583	1.289048	385.8	1.289048	0	-0.001222549
1	447.8589	1.289048	386	1.289048	0	-0.001224405
1	447.6082	1.289048	386.2	1.289048	0	-0.00126164
1	447.8312	1.289048	386.4	1.289048	0	-0.001283593
1	448.5063	1.291826	386.6	1.291826	0	-0.001279621
1	448.7693	1.291826	386.8	1.291826	0	-0.001267474
1	449.7427	1.291826	387	1.291826	0	-0.001258261
1	450.5502	1.291826	387.2	1.291826	0	-0.001297749
1	451.4243	1.294604	387.4	1.294604	0	-0.001303889
1	452.0226	1.294604	387.6	1.294604	0	-0.001288277
1	453.0067	1.294604	387.8	1.294604	0	-0.001261035
1	453.8666	1.294604	388	1.294604	0	-0.00125165
1	453.0886	1.297382	388.2	1.297382	0	-0.001273016
1	452.7354	1.297382	388.4	1.297382	0	-0.001262459
1	452.315	1.297382	388.6	1.297382	0	-0.001260721
1	448.4579	1.297382	388.8	1.297382	0	-0.001242055
1	445.3386	1.30016	389	1.30016	0	-0.001219147
1	444.585	1.30016	389.2	1.30016	0	-0.001263405
1	445.2428	1.30016	389.4	1.30016	0	-0.001295983
1	446.2137	1.30016	389.6	1.30016	0	-0.001306528
1	446.4101	1.302938	389.8	1.302938	0	-0.001427287
1	446.1381	1.302938	390	1.302938	0	-0.001471826
1	446.9082	1.302938	390.2	1.302938	0	-0.001490435
1	447.3582	1.302938	390.4	1.302938	0	-0.001389578
1	447.9199	1.305716	390.6	1.305716	0	-0.001442953
1	449.0486	1.305716	390.8	1.305716	0	-0.00141146
1	449.8061	1.305716	391	1.305716	0	-0.00125633
1	451.1979	1.305716	391.2	1.305716	0	-0.001271494
1	452.3347	1.305716	391.4	1.305716	0	-0.001209796
1	453.8922	1.308495	391.6	1.308495	0	-0.001323152
1	454.9698	1.308495	391.8	1.308495	0	-0.001286588
1	455.9803	1.308495	392	1.308495	0	-0.001301211
1	457.4336	1.308495	392.2	1.308495	0	-0.001277838
1	458.2698	1.311273	392.4	1.311273	0	-0.001289986
1	459.1679	1.311273	392.6	1.311273	0	-0.001306335
1	459.9754	1.311273	392.8	1.311273	0	-0.001355437
1	461.1636	1.311273	393	1.311273	0	-0.001372411
1	461.4387	1.314051	393.2	1.314051	0	-0.001340794
1	457.8904	1.314051	393.4	1.314051	0	-0.001501527
1	454.9486	1.314051	393.6	1.314051	0	-0.001429319
1	454.3878	1.314051	393.8	1.314051	0	-0.001415363
1	454.6743	1.316829	394	1.316829	0	-0.00132492
1	454.8931	1.316829	394.2	1.316829	0	-0.001472728
1	455.3574	1.316829	394.4	1.316829	0	-0.001468103
1	455.7878	1.316829	394.6	1.316829	0	-0.001467776
1	456.3881	1.319607	394.8	1.319607	0	-0.001510816
1	457.064	1.319607	395	1.319607	0	-0.001464645
1	458.1321	1.319607	395.2	1.319607	0	-0.0014814
1	459.6682	1.319607	395.4	1.319607	0	-0.001539522
1	460.8879	1.322385	395.6	1.322385	0	-0.001580638
1	462.1481	1.322385	395.8	1.322385	0	-0.001678914
1	463.6297	1.322385	396	1.322385	0	-0.00174706
1	464.3961	1.322385	396.2	1.322385	0	-0.001988605
1	464.0744	1.325163	396.4	1.325163	0	-0.001811971
1	457.6041	1.325163	396.6	1.325163	0	-0.001533646
1	453.5312	1.325163	396.8	1.325163	0	-0.001447721
1	442.717	1.325163	397	1.325163	0	-0.001477815
1	435.6229	1.325163	397.2	1.325163	0	-0.001459587
1	435.2964	1.327941	397.4	1.327941	0	-0.001506415
1	434.977	1.327941	397.6	1.327941	0	-0.00159442
1	434.0839	1.327941	397.8	1.327941	0	-0.001508873
1	433.7641	1.327941	398	1.327941	0	-0.001508079
1	433.1169	1.33072	398.2	1.33072	0	-0.001544639
1	433.1005	1.33072	398.4	1.33072	0	-0.001812746
1	433.7033	1.33072	398.6	1.33072	0	-0.001703569
1	434.1791	1.33072	398.8	1.33072	0	-0.001617488
1	434.1719	1.333498	399	1.333498	0	-0.001619573
1	434.8007	1.333498	399.2	1.333498	0	-0.001598327
1	434.4192	1.333498	399.4	1.333498	0	-0.001633174
1	434.135	1.333498	399.6	1.333498	0	-0.001653598
1	433.9458	1.336276	399.8	1.336276	0	-0.001881521
1	433.6414	1.336276	400	1.336276	0	-0.001776066
1	433.0743	1.336276	400.2	1.336276	0	-0.001583586
1	433.1551	1.336276	400.4	1.336276	0	-0.001658061
[truncated: 2,337 more rows]
